1 **Integrated metabolic modeling, culturing and transcriptomics explains enhanced**  
2 **virulence of *V. cholerae* during co-infection with ETEC**

3  
4 Alyaa M. Abdel-Haleem<sup>1,2</sup>, Vaishnavi Ravikumar<sup>3</sup>, Boyang Ji<sup>4</sup>, Katsuhiko Mineta<sup>1</sup>, Xin Gao<sup>1</sup>,  
5 Jens Nielsen<sup>3,4</sup>, Takashi Gojobori<sup>\*1,2</sup>, and Ivan Mijakovic<sup>\*§3,4</sup>

6  
7 1 King Abdullah University of Science and Technology (KAUST), Computational Bioscience  
8 Research Centre (CBRC), Thuwal, 23955-6900, Saudi Arabia

9 2 King Abdullah University of Science and Technology (KAUST), Biological and Environmental  
10 Sciences and Engineering (BESE) division, Thuwal, 23955-6900, Saudi Arabia

11 3 Novo Nordisk Foundation Center for Biosustainability, Technical University of Denmark,  
12 Kongens Lyngby, Denmark

13 4 Systems and Synthetic Biology, Department of Chemical and Biological Engineering,  
14 Chalmers University of Technology, Gothenburg, Sweden

15 \* Corresponding authors: [takashi.gojobori@kaust.edu.sa](mailto:takashi.gojobori@kaust.edu.sa) & [ivan.mijakovic@chalmers.se](mailto:ivan.mijakovic@chalmers.se)

16 § Lead contact: [ivan.mijakovic@chalmers.se](mailto:ivan.mijakovic@chalmers.se)

17

18 **Running title**

19 Computational modeling of co-infections

20

21 **Keywords**

22 Infectious diseases, cholera, diarrhea, co-infection, drug target, flux balance analysis,  
23 constraint-based model, genome scale reconstruction

24

25

26

27

28

29

30

31

32

33

34

35

36

37

38

39

40

41

42

43

44

45  
46  
47  
48  
49  
50  
51  
52  
53  
54  
55  
56  
57  
58  
59  
60  
61  
62  
63  
64  
65  
66  
67  
68  
69  
70  
71  
72  
73  
74  
75  
76  
77  
78  
79  
80  
81  
82  
83  
84  
85  
86  
87  
88

## Abstract

Gene essentiality is altered during polymicrobial infections. Nevertheless, most studies rely on single-species infections to assess pathogen gene essentiality. Here, we use genome-scale metabolic models to explore the effect of co-infection of the diarrheagenic pathogen *Vibrio cholerae* (*V. cholerae*) with another enteric pathogen, enterotoxigenic *E. coli* (ETEC). Model predictions showed that *V. cholerae* metabolic capabilities were increased due to ample cross-feeding opportunities enabled by ETEC. This is in line with increased severity of cholera symptoms known to occur in patients with dual-infections by the two pathogens. *In vitro* co-culture systems confirmed that *V. cholerae* growth is enhanced in co-cultures relative to single-cultures. Further, expression levels of several *V. cholerae* metabolic genes were significantly perturbed as shown by dual RNAseq analysis of its co-cultures with different ETEC strains. A decrease in ETEC growth was also observed, probably mediated by non-metabolic factors. Single gene essentiality analysis predicted conditionally-independent genes that are essential for the pathogen's growth in both single- and co-infection scenarios. Our results reveal growth differences that are of relevance to drug targeting and efficiency in polymicrobial infections.

## Importance

Most studies proposing new strategies to manage and treat infections have been largely focused on identifying druggable targets that can inhibit a pathogen's growth when it is the single cause of infection. *In vivo*, however, infections can be caused by multiple species. This is important to take into account when attempting to develop or use current antibacterials since their efficacy can change significantly between single and co-infections. In this study, we used genome-scale metabolic models (GEMs) to interrogate the growth capabilities of *Vibrio cholerae* (*V. cholerae*) in single and co-infections with enterotoxigenic *E. coli* (ETEC), which co-occur in large fraction of diarrheagenic patients. Co-infection model predictions showed that *V. cholerae* growth capabilities are enhanced in presence of ETEC relative to *V. cholerae* single-infection, through cross-fed metabolites made available to *V. cholerae* by ETEC. *In vitro*, co-cultures of the two enteric pathogens further confirmed model predictions showing an increased growth of *V. cholerae* in co-culture relative to *V. cholerae* single-cultures while ETEC growth was suppressed. Dual RNAseq analysis of the co-cultures also confirmed that the transcriptome of *V. cholerae* is distinct during co-infection compared to single infection scenarios where processes related to metabolism were significantly perturbed. Further, *in silico* gene-knock out simulations uncovered discrepancies in gene essentiality for *V. cholerae* growth between single and co-infections. Integrative model-guided analysis thus identified druggable targets that would be critical for *V. cholerae* growth in both single and co-infections, thus designing inhibitors against those targets would provide a broader spectrum coverage against cholera infections.

## 89 Introduction

90 Many studies focus on single-species infections although pathogens often cause infections as  
91 part of multi-species communities<sup>1</sup>. Most studies that aim at identifying essential genomes, for  
92 example, have largely depended on single cultures<sup>2-5</sup>. Such studies, thus, identify sets of  
93 'conditionally-dependent essential' genes depending on the investigated growth conditions. Co-  
94 infecting microorganisms alter pathogen gene essentiality during polymicrobial infections<sup>1</sup>.  
95 Nevertheless, a limited number of studies have attempted to identify variations in growth  
96 capabilities or gene essentiality of a pathogen in co-infection conditions.

97

98 Many metabolic processes are critical for cellular growth and survival, and hence a pathogen's  
99 anabolic and catabolic capabilities are usually tightly linked to its growth capabilities. There is  
100 growing evidence that, in addition to signals from the environment, the metabolism of a  
101 pathogen plays a major role in its virulence as well<sup>6-9</sup>.

102

103 Genome-scale metabolic network reconstructions<sup>10-12</sup> (GEMs) have proven to be powerful tools  
104 to probe the metabolic capabilities of several enteric pathogens including *E. coli*<sup>13</sup>, *Shigella*<sup>13</sup>  
105 and *Salmonella*<sup>14</sup>. GEMs are knowledge bases describing metabolic capabilities and the  
106 biochemical basis for entire organisms<sup>10-12</sup>. GENREs can be mathematically formalized and  
107 combined with numerical representations of biological constraints and objectives to create  
108 genome-scale metabolic models (GEMs)<sup>10-12</sup>. These GEMs can be used to predict biological  
109 outcomes (e.g. gene essentiality, growth rate) given an environmental context (e.g. metabolite  
110 availability<sup>14,15</sup>). Metabolic models recapitulate the biological processes of nutrient uptake and  
111 metabolite secretion, which can be the basis of some microbial interactions<sup>16</sup>. Growing number  
112 of experiments illustrated the predictive power of metabolic-driven computational approaches to  
113 describe emergent behaviors of co-existing species<sup>17-22</sup>. However, deploying computational  
114 models to predict variations in pathogens' growth capabilities when present in single or co-  
115 infecting scenarios has not been investigated.

116

117 *Vibrio cholerae* (*V. cholerae*) is a Gram-negative bacterium that causes acute voluminous  
118 diarrhea representing a dramatic example of an enteropathogenic invasion. Cholera infections  
119 are typically caused by contaminated food and water<sup>23,24</sup>. Seven cholera pandemics have been  
120 recorded in modern history and the latest is still ongoing<sup>25,26,27</sup>. *V. cholerae* life cycle is marked  
121 by repetitive transitions between aquatic environments and the host gastrointestinal tract, thus it  
122 has to adjust to different qualities and quantities of nutrient sources<sup>28</sup>. Within the human host, a  
123 highly active metabolic program is necessary to support *V. cholerae* high growth rates<sup>28</sup> where it  
124 was reported that cell numbers reach up to 10<sup>9</sup> cells/g stool excreted by cholera patients<sup>23,28,29</sup>.  
125 Further, several reports have suggested a role for central metabolism in regulating the  
126 production of virulence factors in *V. cholerae* (cholera toxin 'CTX', and toxin coregulated pilus  
127 'TCP'). For instance, TCP and CTX are not produced when *V. cholerae* is grown in M9-  
128 glycerol<sup>30-32</sup>. The Entner-Doudoroff pathway has been shown to be obligatory for gluconate  
129 utilization and plays an important role in regulating *V. cholerae* virulence<sup>32</sup>. While most case  
130 reports focus on *V. cholerae* as the single causative agent of diarrhea in case of Cholera  
131 infections, *V. cholerae* has commonly been involved in dual infections with enterotoxigenic *E.*  
132 *coli* (ETEC)<sup>33-35</sup>, the second most frequent cause (~15%) of diarrheal diseases after *V. cholerae*.

133 Notably, dual infections of *V. cholerae* and ETEC are associated with increased severity and  
134 increased healthcare costs<sup>34</sup>. Thus, there is a need to study the variations in growth capabilities  
135 and gene essentiality between single- and multi-species infections of pathogens in general, and  
136 of *V. cholerae* in particular.

137  
138 Here, we built a *V. cholerae* genome-scale metabolic model and validated its single gene  
139 essentiality predictions against experimentally published data. We then evaluated the growth  
140 capabilities of *V. cholerae* in relation to other enteric pathogens by simulating their growth on  
141 656 growth conditions spanning several nutrient sources under aerobic and anaerobic  
142 conditions. Following, we reconstructed a co-infection model of *V. cholerae* with ETEC in a  
143 shared environment and compared the growth capabilities of *V. cholerae* in single vs. co-  
144 infection settings. Co-infection model simulations allowed for a comprehensive assessment of  
145 variations in growth capabilities and single gene essentiality when *V. cholerae* is grown solely or  
146 in co-culture with ETEC. *In vitro* co-cultures of the two enteric pathogens as well as dual  
147 RNAseq data reflected corresponding variations in growth predictions and gene expression  
148 levels, respectively. Using single and co-infection models, we predicted *V. cholerae* essential  
149 genes representing potential druggable targets that would be of broader spectrum against *V.*  
150 *cholerae* both single and co-infections. The present work is computationally driven using high  
151 quality experimentally verified *in silico* and *in vitro* models, and can be viewed as a means to  
152 prioritize potential druggable targets of pathogens that are known to be involved in single and  
153 multi-species infections. Further, our results substantiate the notion that data-driven  
154 computational modelling coupled to experiments can predict and analyze microbial communities  
155 behavior.

156  
157 **Results**

### 158 **Characterizing the metabolic capabilities of *V. cholerae***

159 *iAM-Vc960*, a manually curated and quality-controlled GEM of *V. cholerae* was constructed  
160 (Figure 1, Step 1) to probe the enteric pathogen's metabolic capabilities and gene essentiality in  
161 single and co-infections. We sequenced and annotated the genome of *V. cholerae* 52, an O37  
162 serotype strain (see methods section, and Figure S1 at  
163 [https://github.com/alyamahmoud/coinfection\\_modeling/blob/master/supplementary\\_material/sup](https://github.com/alyamahmoud/coinfection_modeling/blob/master/supplementary_material/supplementary_text.docx)  
164 [plementary\\_text.docx](https://github.com/alyamahmoud/coinfection_modeling/blob/master/supplementary_material/supplementary_text.docx) ). A list of metabolic pathways in *V. cholerae* V52 was built based on the  
165 genome annotation generated in this study as well as those available in PATRIC and that of *V.*  
166 *cholerae* O1 N16961 (see Table S1 at  
167 [https://github.com/alyamahmoud/coinfection\\_modeling/blob/master/supplementary\\_material/sup](https://github.com/alyamahmoud/coinfection_modeling/blob/master/supplementary_material/supplementary_tables.xlsx)  
168 [plementary\\_tables.xlsx](https://github.com/alyamahmoud/coinfection_modeling/blob/master/supplementary_material/supplementary_tables.xlsx) ). The reconstruction was converted into a model and the stoichiometric  
169 matrix was constructed with mass and charge balanced reactions in the standard fashion using  
170 the COBRA toolbox v.3.0.<sup>36</sup> Flux balance analysis was used to assess network characteristics  
171 and perform simulations<sup>37</sup>. The biomass function was constructed primarily based on that of *V.*  
172 *vulnificus*<sup>7</sup> and *E. coli* K12 *iJO1366*<sup>38</sup>. Transcriptomics data of *V. cholerae* V52 single-cultures in  
173 minimal media was also generated and used to further refine *iAM-Vc960* reconstruction and  
174 biomass objective function (see Table S1 at  
175 [https://github.com/alyamahmoud/coinfection\\_modeling/blob/master/supplementary\\_material/sup](https://github.com/alyamahmoud/coinfection_modeling/blob/master/supplementary_material/supplementary_tables.xlsx)  
176 [plementary\\_tables.xlsx](https://github.com/alyamahmoud/coinfection_modeling/blob/master/supplementary_material/supplementary_tables.xlsx)). *iAM-Vc960* accounts for 2172 reactions, 1741 metabolites across three

177 compartments (cytosol, periplasm and extracellular compartments) and 960 metabolic genes.  
178 Gene-protein-reaction (GPR) associations could be defined for 72% of all enzymatic reactions  
179 (Figure 2A). *iAM-Vc960* exceeds the automatically generated *V. cholerae* model as part of the  
180 Path2Models<sup>39</sup> project in terms of its gene, metabolite and reaction content. 584 (89%) of the  
181 Path2Models *V. cholerae* model genes were already in *iAM-Vc960*. The remaining 68 genes  
182 were mostly non-metabolic. The Path2Models *V. cholerae* model as downloaded from the  
183 biomodels repository was unable to produce any biomass, thus we could not perform a  
184 functional comparison between *iAM-Vc960* and the previously published *V. cholerae* model (see  
185 supplementary text at  
186 [https://github.com/alyamahmoud/coinfection\\_modeling/blob/master/supplementary\\_material/supplementary\\_text.docx](https://github.com/alyamahmoud/coinfection_modeling/blob/master/supplementary_material/supplementary_text.docx)  
187 for details on comparison to other previously published *V. cholerae*  
188 GEMs<sup>40</sup>).

189  
190 *iAM-Vc960* predicted growth rate was 1.07 mmol/gDW/h, in M9 minimal medium supplemented  
191 with glucose, corresponding to a doubling time of 39 minutes. Previous experiments<sup>41</sup> using *V.*  
192 *cholerae* species reported doubling times of 38 min and 147 min for fast and slow growth,  
193 respectively. Hence, *iAM-Vc960* predicted doubling time was within the expected range.

194  
195 In order to further validate *iAM-Vc960* predictions, we tested if *iAM-Vc960* could correctly predict  
196 gene essentiality. Multiple attempts have been made to generate definitive lists of essential  
197 genes, but there are still many discrepancies between these studies even for a model bacterium  
198 such as *E. coli* strain K-12<sup>42</sup>. We thus compiled a high confidence set of genes (n = 223, see  
199 Table S2 at  
200 [https://github.com/alyamahmoud/coinfection\\_modeling/blob/master/supplementary\\_material/supplementary\\_tables.xlsx](https://github.com/alyamahmoud/coinfection_modeling/blob/master/supplementary_material/supplementary_tables.xlsx)  
201 ) that have been shown to be critical for *V. cholerae* growth and survival  
202 from three independent previously published studies<sup>43-45</sup>. In rich medium (Luria-Bertani broth,  
203 LB), *iAM-Vc960* correctly predicted 71% of the experimentally verified metabolic gene knock-  
204 outs (see Table S2 at  
205 [https://github.com/alyamahmoud/coinfection\\_modeling/blob/master/supplementary\\_material/supplementary\\_tables.xlsx](https://github.com/alyamahmoud/coinfection_modeling/blob/master/supplementary_material/supplementary_tables.xlsx)  
206 ). In a second step, we also used gene essentiality data for *V. cholerae*  
207 str. C6706, a closely related O1 El Tor isolate, obtained from the Online GENE Essentiality  
208 (OGEE) database<sup>4,5</sup> which contains information for essential (n = 458) and non-essential genes  
209 (n = 3144) (see supplementary text for a comment on serotype differences at  
210 [https://github.com/alyamahmoud/coinfection\\_modeling/blob/master/supplementary\\_material/supplementary\\_text.docx](https://github.com/alyamahmoud/coinfection_modeling/blob/master/supplementary_material/supplementary_text.docx)  
211 ). The overall accuracy of *iAM-Vc960* in reproducing OGEE essentiality  
212 (and non-essentiality) data was 87% (Figure 2B) (see supplementary text at  
213 [https://github.com/alyamahmoud/coinfection\\_modeling/blob/master/supplementary\\_material/supplementary\\_text.docx](https://github.com/alyamahmoud/coinfection_modeling/blob/master/supplementary_material/supplementary_text.docx)  
214 for details). Overall, *iAM-Vc960* predicted 225 and 171 genes to be  
215 essential for optimal *V. cholerae* growth in minimal and rich media, respectively.

216  
217 The agreement between the experimental gene essentiality data, obtained from previously  
218 published studies, and the computational results, generated in the current study, in terms of  
219 growth and single gene essentiality predictions, on the whole, validates the content of the  
220 reconstruction, the modeling procedure and the objective function definition (Figure 1, step 1).

221 As such, *iAM-Vc960* is a high-quality manually curated genome-scale model that can simulate  
222 *V. cholerae* metabolism and thus, can be used to predict phenotypic behavior of *V. cholerae* in  
223 response to different perturbations (e.g. culture conditions, interaction partners ...etc). This  
224 prompted us to systematically and comprehensively assess the metabolic capabilities of *V.*  
225 *cholerae* to study how the pathogen adapts its network across the different growth conditions,  
226 assess the relative metabolic capacity of *V. cholerae* in relation to other enteric pathogens, as  
227 well as how the pathogen's growth capabilities and gene essentiality is impacted in presence of  
228 other co-infecting pathogens.

229

### 230 ***V. cholerae* has restricted metabolic capabilities compared to *E. coli* and *Shigella***

231 Since enteric bacterial pathogens span several genera including *Escherichia*, *Salmonella*, and  
232 *Shigella*, we thought it would be relevant to assess the metabolic capabilities of *V. cholerae* in  
233 relation to other pathogens that cause diarrhea (Figure 1, Step 2). Using *iAM-Vc960*, we  
234 simulated growth capabilities of *V. cholerae* relative to a set of previously published<sup>13</sup> GEMs of  
235 55 *E. coli* (both commensal and pathogenic) and *Shigella* species on minimal media with 656  
236 different growth-supporting carbon, nitrogen, phosphorous, and sulfur sources in aerobic and  
237 anaerobic conditions<sup>13,14</sup>. *iAM-Vc960* model size was in line with the smaller genome size of *V.*  
238 *cholerae* compared to *E. coli* and *Shigella* (Figure 3A) where *V. cholerae* has 3855 ORFs while  
239 *Shigella* and *E. coli* each has on average 4199 and 4663 ORFs, respectively. Nevertheless,  
240 *iAM-Vc960* metabolic genes covered 25% of *V. cholerae* ORFs<sup>46</sup>. Notably, *iJO1366*, the most  
241 well developed and curated genome-scale metabolic model covers 29% of *E. coli* str. K-12  
242 substr. MG1655 ORFs. On average, *Shigella* and *E. coli* GEMs covered 27% and 29%,  
243 respectively of the corresponding species ORFs.

244

245 We first confirmed known metabolic differences for distinguishing *V. cholerae* from other enteric  
246 pathogens (Figure 3B-C). For instance, *iAM-Vc960* predicted the ability of *V. cholerae* to utilize  
247 sucrose as sole carbon source<sup>47,48</sup>. *iAM-Vc960* could not utilize arginine as sole carbon or  
248 nitrogen sources while all *E. coli* and *Shigella* models were able to utilize arginine under aerobic  
249 conditions<sup>49,50</sup> in line with the frequent usage of the absence of arginine metabolism for  
250 characterizing *V. cholerae*<sup>51</sup>. Similarly, while *E. coli* and *Shigella* were able to utilize myo-  
251 inositol as sole phosphorus source, *iAM-Vc960* predicted failure of *V. cholerae* to grow when no  
252 other phosphorus source is present in the medium<sup>49</sup>. Further, *iAM-Vc960* also correctly  
253 predicted the ability of *V. cholerae* to utilize trehalose or mannitol as alternative carbon sources  
254 both in aerobic and anaerobic conditions<sup>50,51</sup>.

255

256 In contrast to *E. coli*, *V. cholerae* model displayed large loss of catabolic capabilities across the  
257 656 tested growth conditions (Figure 3B-C, see Table S4-S5 at  
258 [https://github.com/alyamahmoud/coinfection\\_modeling/blob/master/supplementary\\_material/supplementary\\_tables.xlsx](https://github.com/alyamahmoud/coinfection_modeling/blob/master/supplementary_material/supplementary_tables.xlsx)). This computational result implies that *V. cholerae*, similar to *Shigella*  
259 and several pathogenic *E. coli*<sup>52</sup>, might have lost catabolic pathways for many nutrient sources.  
260 Model predictions showed that *V. cholerae* was able to grow in 51% (n = 336) of the simulated  
261 growth conditions, while *E. coli* and *Shigella* were able to grow, on average, in 92% (n = 602)  
262 and 75% (n = 493) of the tested growth conditions, respectively (Figure 3B, see Table S4-S5 at  
263 [https://github.com/alyamahmoud/coinfection\\_modeling/blob/master/supplementary\\_material/supplementary\\_tables.xlsx](https://github.com/alyamahmoud/coinfection_modeling/blob/master/supplementary_material/supplementary_tables.xlsx))  
264

265 [plementary tables.xlsx](#) ) implicating that *V. cholerae* has less versatile metabolic capabilities  
266 compared to either *E. coli* or *Shigella*. In fact, *V. cholerae* metabolic capabilities were more  
267 similar to *Shigella* than *E. coli* (Figure 3C). *V. cholerae* model completely lost the capability to  
268 sustain growth on nutrient sources for which most of *E. coli* and *Shigella* models had growth  
269 capabilities. Some of these nutrients include D-lactate, D-fumarate, lactose, L-alanine-  
270 glutamate, uridine, xanthosine, thymidine, R-Glycerate, sn-Glycero-3-phosphoethanolamine, 4-  
271 Hydroxy-L-threonine, L-Asparagine, L-proline, L-Arabinose, and L-Xylulose as carbon sources  
272 as well as nitrate, nitrite<sup>53</sup>, ornithine, L-proline, agmatine, uracil, and putrescine<sup>54</sup>, as nitrogen  
273 sources, and myo-Inositol-hexakisphosphate as phosphorus sources. Further, most *Shigella*  
274 models and *iAM-Vc960* were unable to sustain growth on chitobiose, D-Malate, D-Sorbitol, L-  
275 Fucose, ethanolamine, galactitol, propionate, D-Galactonate, choline, allantoin as sole carbon  
276 sources as well as hypoxanthine, inosine, and urea as nitrogen sources, whereas almost all  
277 other *E. coli* models examined were able to sustain growth under the same conditions.

278  
279 Several tests based on nutrient utilization are routinely used to distinguish between pathogens  
280 that cause diarrhea. Using GEMs of enteric pathogens can aid in predicting potential metabolite  
281 markers that, upon experimental validation, could be used in clinical practice to diagnose the  
282 causative agent of diarrhea or an enteric pathogenesis in general.

283

#### 284 **Predicted expanded growth capabilities of *V. cholerae* in co-culture with ETEC**

285 Computational approaches modelling metabolic fluxes between organisms can be used to  
286 provide a mechanistic understanding of interaction patterns between different microbes<sup>17,21,55,56</sup>.  
287 An emergent behavior in co-culture will also relate to the extent of overlapping resources  
288 between the component species as well as whether or not there will be any cross-fed  
289 substrates<sup>22</sup>. Using *V. cholerae* as our model organism, we wanted to investigate how the  
290 metabolic capabilities (as proxy of growth capabilities) of *V. cholerae* will vary if other co-  
291 infecting pathogens are involved (Figure 1, Step 3). We thus set to model co-infections of *V.*  
292 *cholerae* and ETEC. *V. cholerae* (~25%) followed by ETEC (~15%) are the most prevalent  
293 bacterial pathogens causing diarrheal diseases in the developing world<sup>33</sup>. These bacteria are  
294 representative of species found in the same environment and are both involved in enteric  
295 pathogenesis. In particular, the choice of these species was inspired by the recurrent dual  
296 infections of both species in hospitalized patients due to diarrhea<sup>33-35</sup>. The antibody titer against  
297 cholera toxin (but not against heat-stable or heat-labile toxins produced by ETEC) was also  
298 found to increase in case of dual infections of *V. cholerae* and ETEC relative to single *V.*  
299 *cholerae* infections<sup>34</sup>, although no mechanistic explanation was attributed to these variations. *V.*  
300 *cholerae* V52 was also observed to be virulent against several other Gram-negative species  
301 including *E. coli* although ETEC was not tested<sup>57</sup>.

302  
303 To investigate the behavior of the individual pathogens in co-infection relative to their single  
304 infections, we used *iAM-Vc960* and a previously reconstructed GEM of ETEC, *iETEC1333*<sup>13</sup> to  
305 simulate the growth of *V. cholerae* and ETEC in a single shared environment<sup>58,59</sup>. Metabolic  
306 genes, metabolic reactions, and metabolites were compared across the species-specific  
307 networks. *iAM-Vc960* and *iETEC-1333* had 1672 metabolites in common. This represented 96%  
308 and 85% of *V. cholerae* and ETEC total metabolites, respectively. To distinguish between

309 shared and species-specific metabolites, each organism was represented as a separate  
310 compartment (Figure 4A) with a shared space representing the co-culture/infection medium.  
311 23% (n = 380) of the common metabolites between the two models were amenable to exchange  
312 by being available in the shared extracellular space (Figure 4A). In total, the co-culture model,  
313 *Nc*-ETEC-2293, had 4550 reactions, 3335 metabolites and 2293 genes. The objective function  
314 was set to maximize the biomass function of each pathogen, simulating growth of both species  
315 at 1:1 composition (see methods section and supplementary text at  
316 [https://github.com/alyamahmoud/coinfection\\_modeling/blob/master/supplementary\\_material/sup](https://github.com/alyamahmoud/coinfection_modeling/blob/master/supplementary_material/supplementary_text.docx)  
317 [plementary\\_text.docx](https://github.com/alyamahmoud/coinfection_modeling/blob/master/supplementary_material/supplementary_text.docx) for details in development and refinement of the co-culture model).

318  
319 We then used the same set of 656 growth conditions to assess the difference in metabolic  
320 capabilities of *V. cholerae* and *ETEC* in single- and co-infections. All three models (*iAM*-Vc960,  
321 *iETEC*1333 and *Nc*-ETEC-2293) were able to grow in 51% (n = 333) of the tested growth  
322 conditions. *ETEC* was able to grow in 42% (n = 277) growth conditions that *V. cholerae* was  
323 unable to utilize in single-culture. However, *iCo*-Culture2993 acquired the capability to grow  
324 under the same conditions (Figure 4B, see Table S4-S5 at  
325 [https://github.com/alyamahmoud/coinfection\\_modeling/blob/master/supplementary\\_material/sup](https://github.com/alyamahmoud/coinfection_modeling/blob/master/supplementary_material/supplementary_tables.xlsx)  
326 [plementary\\_tables.xlsx](https://github.com/alyamahmoud/coinfection_modeling/blob/master/supplementary_material/supplementary_tables.xlsx)). A closer look revealed that most of those acquired capabilities were  
327 due to ample cross-feeding opportunities enabled by the *ETEC* model. For instance, *iAM*-Vc960  
328 is unable to grow on putrescine as sole nitrogen or carbon sources. *iETEC*1333 and *iCo*-  
329 culture2993, however, are able to degrade putrescine into glutamate by putrescine  
330 transaminase (*patA*: ETEC\_3343) or into glutamate and succinate through the gamma-glutamyl  
331 putrescine synthetase (*puuA*: ETEC\_1401)/oxidoreductase (*puuB*: ETEC\_1405) pathway, both  
332 being absent in *V. cholerae* genome. Similarly, *V. cholerae* cannot catabolize uridine (and  
333 xanthine) whereas *ETEC* can degrade uridine, xanthine and xanthosine into ribose as it  
334 possesses pyrimidine-specific ribonucleoside hydrolases (*RihA*, *RihB*, *RihC*: ETEC\_0680,  
335 ETEC\_2297, ETEC\_0030) which can potentially be cross-fed to *V. cholerae*. In addition, several  
336 D- amino acids were observed to be cross-fed where they are degraded by *ETEC* into forms  
337 that can be utilised by *V. cholerae*, e.g. D-allose which is degraded by *ETEC* D-allose kinase  
338 (*alsK*: ETEC\_4394) into fructose-6-phosphate that can be cross-fed to *V. cholerae*. Similarly,  
339 fructoselysine is metabolised by *ETEC* fructoselysine kinase (*frlD*: ETEC\_3624) and  
340 fructoselysine 6-phosphate deglycase (*frlB*: ETEC\_3622) into glucose-6-phosphate which can  
341 be cross-fed to *V. cholerae*. None of those genes have been identified in the genome of *V.*  
342 *cholerae* to date (determined via searching the annotated genome of *V. cholerae* O1 biovar El  
343 Tor str. N16961 in PATRIC<sup>60</sup>, Uniprot<sup>61</sup>, the annotated genome of *V. cholerae* V52 generated in  
344 this study as well as two other assemblies GCF\_001857545.1 and GCF\_000167935.2 retrieved  
345 through PATRIC<sup>60</sup>).

346  
347  
348 Overall, *iETEC*1333, *iAM*-Vc960 and *Nc*-ETEC-2293 were able to grow in 94% (n = 614), 51%  
349 (n = 336) and 93% (n = 613) of the simulated growth conditions, respectively (Figure 4B). As  
350 such, we predict that *V. cholerae* metabolic capabilities are expanded in co-infections with  
351 *ETEC* relative to *V. cholerae* single-infections while *ETEC* metabolic capabilities are almost not  
352 affected where the main differences among the two species lie in their capability to uptake and



353 catabolize various nutrient sources. Our modeling approach thus provides mechanistic insights  
354 into the observed increase in cholera infection severity in clinical patients who demonstrated  
355 increased antibody titers against cholera (and not ETEC) toxin in case of co-infections by the  
356 two enteric pathogens<sup>34</sup>.

357

### 358 **Growth of *V. cholerae* is enhanced when co-cultured with ETEC *in vitro***

359 To validate our predictions, we employed single- and co-culture *in vitro* experiments (Figure 1,  
360 Step 4) to assess the predictions made by our enteric pathogens co-infection model (Figure 4C-  
361 D, see Table S6 at  
362 [https://github.com/alyamahmoud/coinfection\\_modeling/blob/master/supplementary\\_material/supplementary\\_tables.xlsx](https://github.com/alyamahmoud/coinfection_modeling/blob/master/supplementary_material/supplementary_tables.xlsx) ). To this end, we developed a robust *in vitro* co-culture system of *V.*  
364 *cholerae* V52 and two different ETEC strains (E36 or E616) in M9 minimal medium  
365 supplemented with glucose (Figure 4C-D). All three tested strains (V52, E36 & E616) are clinical  
366 isolates that have been sequenced and characterized before<sup>62,63</sup> (see supplementary text at  
367 [https://github.com/alyamahmoud/coinfection\\_modeling/blob/master/supplementary\\_material/supplementary\\_text.docx](https://github.com/alyamahmoud/coinfection_modeling/blob/master/supplementary_material/supplementary_text.docx)  
368 for details on strain selection and sequencing performed as part of the  
369 current study). We determined the impact of the co-culture on each strain's growth by  
370 comparing single culture abundance over 10 hours of growth to the abundance of each strain in  
371 co-culture at the same time (determined using CFU counting; all strains were in transition or  
372 stationary phase). E36 and E616 were shown to have diminished ability to grow in co-culture  
373 with *V. cholerae* V52. By contrast, growth of *V. cholerae* V52 was strongly enhanced in co-  
374 culture conditions (Fig. 4C-D).

375

376 The growth data regarding *V. cholerae* V52 were in agreement with the modelling predictions.  
377 When comparing maximal abundances, cross-feeding and competitive interactions were already  
378 apparent. *V. cholerae* V52 reached higher maximal bacterial counts in *V. cholerae* V52/ETEC  
379 E36 (unpaired two-sided Wilcoxon: shift 5.8e+09, 90% confidence interval 3.8e+09 to 6.8e+09,  
380 p-value 0.07) and in *V. cholerae* V52/ETEC E616 (unpaired two-sided Wilcoxon: shift 5.6e+09,  
381 90% confidence interval 4.4e+09 to 8.8e+09, p-value 0.1) co-cultures (Figure 4C-D). The  
382 maximum cell number of both ETEC strains tended to be lower when competing with *V.*  
383 *cholerae* V52 than when grown alone (unpaired two-sided Wilcoxon E36: shift -1.06e+10, 90%  
384 confidence interval -1.14e+10 to -8.60e+09, p-value 0.07; unpaired two-sided Wilcoxon E616:  
385 shift -6e+09, 90% confidence interval -9.4e+09 to -2.0e+09, p-value 0.1). Finally, according to  
386 maximal bacterial counts, E36 was more negatively affected by the presence of *V. cholerae* V52  
387 than E616 (unpaired two-sided Wilcoxon E36: shift -6.4e+09, 90% confidence interval -9.4e+09  
388 to -5.2e+09, p-value 0.1).

389

390 Although our modeling procedure predicted and explained the increase in *V. cholerae* growth  
391 capabilities when co-cultured with ETEC, the decrease in abundance of ETEC in *V. cholerae*  
392 V52/ETEC co-cultures was not captured by our metabolic models. *V. cholerae* V52 was  
393 previously found to be highly virulent against several Gram-negative bacteria, including *E. coli*  
394 and *Salmonella Typhimurium*, due to type VI secretion system (T6SS)<sup>57</sup>. Although ETEC was  
395 not tested for in these experiments, it is expected that ETEC would behave similarly to closely  
396 related pathogenic *E. coli* strains (EPEC, EHEC). Thus, the decrease in ETEC growth is very

397 likely mediated by non-metabolic factors. We also focus on the improved growth of *V. cholerae*  
398 since this is of potential clinical relevance and since the decrease in ETEC growth in *V. cholerae*  
399 co-cultures has been investigated before.

400

#### 401 **Altered gene expression in single- and multi-species co-cultures**

402 To assess the level of genetic perturbations due to addition of ETEC as an interaction partner to  
403 *V. cholerae* cultures, we conducted a dual RNAseq analysis<sup>64-67</sup> of *V. cholerae* co-cultures  
404 (Figure 1, Step 4) with each of the two ETEC strains (E36 or E616). We then compared the  
405 gene expression levels for each pathogen to its single-culture (see methods section and Tables  
406 S7-S10 at

407 [https://github.com/alyamahmoud/coinfection\\_modeling/blob/master/supplementary\\_material/supplementary\\_tables.xlsx](https://github.com/alyamahmoud/coinfection_modeling/blob/master/supplementary_material/supplementary_tables.xlsx)). Through principal component analysis (PCA) (Figure 5, see Figure S5  
408 at

409 [https://github.com/alyamahmoud/coinfection\\_modeling/blob/master/supplementary\\_material/supplementary\\_text.docx](https://github.com/alyamahmoud/coinfection_modeling/blob/master/supplementary_material/supplementary_text.docx) ), we found that the co-cultures expression data clustered independently  
410 from single-culture data indicating that the transcriptome of *V. cholerae* is distinct during co-

411 culture compared to single-culture. The expression of 20% of *V. cholerae* quantifiable  
412 transcriptome was significantly altered when either strains of ETEC was added to the culture. In

413 particular, 15-17% of *V. cholerae* genome was upregulated while 4-5% was downregulated in *V.*  
414 *cholerae* co-culture with ETEC relative to its single culture. *V. cholerae* differentially expressed

415 genes were enriched in diverse metabolic processes spanning amino acid metabolism like  
416 tyrosine and L-phenylalanine (P value < 0.01, odds ratio > 10) as well as carbohydrate  
417 metabolic processes (P value < 0.05, odds ratio = 2.630409). (Figure 5, see Tables S9-S10 at

418 [https://github.com/alyamahmoud/coinfection\\_modeling/blob/master/supplementary\\_material/supplementary\\_tables.xlsx](https://github.com/alyamahmoud/coinfection_modeling/blob/master/supplementary_material/supplementary_tables.xlsx) ). Upregulation of certain amino acid biosynthesis pathways, that can be  
419 catabolized by both species, highlights that despite potential cross-feeding between the two  
420 pathogens, presence of more than one infectious agent might eventually lead to competition<sup>68</sup>.

421 Further, in support of non-metabolic mediated suppression in growth observed for ETEC, E36  
422 differentially expressed processes were significantly enriched in taxis and chemotaxis GO terms  
423 (P value = 3.8e-05 and odds ratio > 20). Also, in line with previous reports<sup>57,63</sup> about T6SS  
424 expression levels, T6SS components were constitutively expressed in *V. cholerae* V52 in both  
425 single- and co-cultures (see Tables S9-S10 at

426 [https://github.com/alyamahmoud/coinfection\\_modeling/blob/master/supplementary\\_material/supplementary\\_tables.xlsx](https://github.com/alyamahmoud/coinfection_modeling/blob/master/supplementary_material/supplementary_tables.xlsx) ).

427 In line with predicted cross-feeding interactions between *V. cholerae* and ETEC, we found that  
428 gamma-glutamyl putrescine oxidase (*puuB*), putrescine utilisation regulator (*puuR*) as well as  
429 several putrescine transporters were indeed significantly upregulated in E616/V52 co-culture  
430 relative to E616 single culture (logFC > 1.5, adjusted p value < 0.05). Furthermore, neither *patA*  
431 nor *puuB* were expressed in *V. cholerae* V52. Similarly, ribose 5-phosphate isomerase B (*rpiB*)  
432 and transcriptional regulator of D-allose utilization (*rpiR*) were significantly upregulated in  
433 E616/V52 co-culture relative to E616 single culture (logFC > 2, adjusted p value < 0.005) and  
434 were not expressed in *V. cholerae* V52. Lastly, transcriptional regulator of fructoselysine  
435 utilization operon (*friR*), fructoselysine 6-kinase (*friD*), fructoselysine 3-epimerase (*friC*), and  
436

437

438

439

440

441

442

443

444

441 fructoselysine-6-phosphate deglycase (*frlB*) were also significantly upregulated in E616/V52 co-  
442 culture relative to E616 single-culture (logFC > 1-1.5, adjusted p value < 0.05).

443

444 Interestingly, expression levels of bacteriocins' related genes in ETEC strains showed that  
445 colicins' production and tolerance genes were significantly upregulated in E616 co-culture with  
446 *V. cholerae* V52 relative to the individually grown E616 (see Table S8 at  
447 [https://github.com/alyamahmoud/coinfection\\_modeling/blob/master/supplementary\\_material/sup](https://github.com/alyamahmoud/coinfection_modeling/blob/master/supplementary_material/supplementary_tables.xlsx)  
448 [plementary\\_tables.xlsx](https://github.com/alyamahmoud/coinfection_modeling/blob/master/supplementary_material/supplementary_tables.xlsx)). In contrast, E36, whose growth is more sensitive to co-growth with *V.*  
449 *cholerae* V52 failed to up-regulate genes encoding colicin V production and tolerance genes  
450 (see Table S7 at  
451 [https://github.com/alyamahmoud/coinfection\\_modeling/blob/master/supplementary\\_material/sup](https://github.com/alyamahmoud/coinfection_modeling/blob/master/supplementary_material/supplementary_tables.xlsx)  
452 [plementary\\_tables.xlsx](https://github.com/alyamahmoud/coinfection_modeling/blob/master/supplementary_material/supplementary_tables.xlsx)). Colicin V is a peptide antibiotic that members of *Enterobacteriaceae*  
453 commonly used to kill closely related bacteria in an attempt to reduce competition for essential  
454 nutrients<sup>69</sup>. To sum up, the difference in expression level of genes encoding colicins production  
455 and resistance explains why E36 growth was more severely affected when co-cultured with *V.*  
456 *cholerae* V52 relative to E616 (see Figure S5 at  
457 [https://github.com/alyamahmoud/coinfection\\_modeling/blob/master/supplementary\\_material/sup](https://github.com/alyamahmoud/coinfection_modeling/blob/master/supplementary_material/supplementary_text.docx)  
458 [plementary\\_text.docx](https://github.com/alyamahmoud/coinfection_modeling/blob/master/supplementary_text.docx)).

459

460 RNAseq thus confirmed that there is an emergent behavior in the co-cultures and that the  
461 observed changes were not just due to variations in inoculum composition or the lag phase<sup>67</sup>.  
462 Taken together, our integrated modeling, co-culturing and transcriptomics approach provided  
463 mechanistic insights into the observed increase in cholera infection severity in dual infections  
464 with ETEC where ETEC co-infection results in an increased growth of *V. cholerae* due to  
465 expanded metabolic capabilities enabled by ETEC. In parallel, *V. cholerae* suppress ETEC  
466 growth by non-metabolic factors resulting in an increase in cholera infection severity but not  
467 ETEC as monitored by antibody titer against species-specific toxins<sup>34</sup>.

468

#### 469 **Evaluation of experimentally validated essential genes across single and co-infections** 470 **models of *V. cholerae***

471 The essential genome of a large class of bacterial species has been characterized as it encodes  
472 potential targets for antibacterial drug development<sup>42,70</sup>. Interestingly, metabolic genes have  
473 predominated in studies of essential genomes of microbial pathogens<sup>70,71</sup>. With this in mind, we  
474 attempted to construct a comprehensive map of *V. cholerae* essential metabolic genome  
475 (Figure 1, Step 5) by projecting the list of experimentally validated essential genes onto our  
476 single and co-infection models' predictions (Figure 6, see Table S2  
477 [https://github.com/alyamahmoud/coinfection\\_modeling/blob/master/supplementary\\_material/sup](https://github.com/alyamahmoud/coinfection_modeling/blob/master/supplementary_material/supplementary_tables.xlsx)  
478 [plementary\\_tables.xlsx](https://github.com/alyamahmoud/coinfection_modeling/blob/master/supplementary_tables.xlsx)). Selecting targets that are critical in both single and co-infection settings  
479 would promote the discovery of novel targets or new combinations of existing antibacterials that  
480 would be effective in a broader spectrum of cholera infections. The color scheme of highlighted  
481 reactions (Figure 6) denotes model prediction classification across single and co-infections. The  
482 red group in Figure 6 highlights reactions predicted to be sensitive in both single as well as co-  
483 infections; this is of particular importance since the efficacy of some of the commonly used  
484 treatment drugs might significantly be altered in presence of more than one infecting agent.

485 There are several gene deletions associated with reactions for which drugs have not been  
486 developed (see Table S2 at  
487 [https://github.com/alyamahmoud/coinfection\\_modeling/blob/master/supplementary\\_material/sup  
488plementary\\_tables.xlsx](https://github.com/alyamahmoud/coinfection_modeling/blob/master/supplementary_material/supplementary_tables.xlsx) ). These highlight potential targets for new drug development that may  
489 aid in treating enteric pathogenesis. We also note that the green group identifies reactions that  
490 were missed by the models, and highlights areas for future model refinement.

491  
492 Out of the 80 metabolic genes that have been experimentally shown to be essential for *V.*  
493 *cholerae* growth and survival across several studies (see Table S2 at  
494 [https://github.com/alyamahmoud/coinfection\\_modeling/blob/master/supplementary\\_material/sup  
495plementary\\_tables.xlsx](https://github.com/alyamahmoud/coinfection_modeling/blob/master/supplementary_material/supplementary_tables.xlsx) ), our co-culture model predicted 47 genes to be critical for *V. cholerae*  
496 growth even when a more metabolically versatile enteropathogen like ETEC is added to the  
497 culture irrespective of the variation in species composition (see methods section and Table S2  
498 at  
499 [https://github.com/alyamahmoud/coinfection\\_modeling/blob/master/supplementary\\_material/sup  
500plementary\\_tables.xlsx](https://github.com/alyamahmoud/coinfection_modeling/blob/master/supplementary_material/supplementary_tables.xlsx) for details). This set of 47 genes (Figure 6, red colored) represent  
501 potential drug targets that are predicted to be effective in killing *V. cholerae* whether it is the sole  
502 cause of diarrhea or as part of polymicrobial infection. Most of these enzymes were involved in  
503 cofactor biosynthesis (e.g. coenzyme A, tetrahydrofolate, FAD, pyridoxone-5-phosphate,  
504 pantothenate, and iron-sulfur cluster), isoprenoid and porphyrin metabolism as well as  
505 pyrimidine metabolism (Figure 6). Inhibitors of several of those enzymes have already been  
506 reported to have bactericidal effect<sup>60</sup> in *V. cholerae* as well as in other enteric and non-enteric  
507 pathogens (see Table S2 at  
508 [https://github.com/alyamahmoud/coinfection\\_modeling/blob/master/supplementary\\_material/sup  
509plementary\\_tables.xlsx](https://github.com/alyamahmoud/coinfection_modeling/blob/master/supplementary_material/supplementary_tables.xlsx) ). For instance, phosphopantetheine adenylyltransferase and  
510 thymidylate synthase have been already reported as drug targets<sup>60</sup> in *V. cholerae* and ETEC  
511 E616. N-acetylglucosamine transferase is a promising drug target for *Salmonella enterica* while  
512 dephospho-CoA kinase has been shown to be an interesting drug target in ETEC E616 and  
513 *Shigella flexneri*<sup>60</sup>. Interestingly, 12 *V. cholerae* genes were also predicted to totally lose their  
514 essentiality in dual infections with ETEC. Some of those were involved in *de novo* purine  
515 metabolism (VC1126: *purB*, VC2602: *purA*) and carbohydrate degradation (VC0477: *pgk*,  
516 VC0478: *fbaA*) implicating that *V. cholerae* is probably depending on ETEC to salvage these  
517 nutrients.

518  
519 ATP synthase subunits were essential for *V. cholerae* growth in single cultures as predicted by  
520 *iAM-Vc960*. Deletion of any of the 7 genes of F0/F1 ATP synthase locus in the co-culture model  
521 resulted in a species-composition dependent reduction in reduced optimal growth (see Table S2  
522 at  
523 [https://github.com/alyamahmoud/coinfection\\_modeling/blob/master/supplementary\\_material/sup  
524plementary\\_tables.xlsx](https://github.com/alyamahmoud/coinfection_modeling/blob/master/supplementary_material/supplementary_tables.xlsx) ). In models simulating high *V. cholerae* abundance relative to ETEC,  
525 ATP synthase subunits were essential for optimal co-culture growth. In contrast, models  
526 simulating higher ETEC abundance relative to *V. cholerae* were less affected when ATP  
527 synthase subunits were deleted. F0/F1 ATP synthase genes have been shown to be essential  
528 in a variety of bacteria<sup>43,72-75</sup> and have been recently reported as essential in *V. cholerae*<sup>43</sup>. In *E.*

529 *coli*, however, ATP synthase is not essential<sup>43,76,77</sup>. Thus, drug inhibitors (acting on ATP  
530 synthase subunits) that would normally kill *V. cholerae* in single-infections would have  
531 decreased efficacy in case of dual infections with *E. coli*. This suggests that comparison of  
532 essential genes between organisms can uncover distinct ecological and physiological  
533 requirements for each species<sup>43</sup> and should inspire future experiments to validate our  
534 computational predictions. Similarly, sodium-dependent NADH dehydrogenase (Na<sup>+</sup>-NQR), a  
535 key component of the respiratory chain of diverse bacterial species, including pathogenic  
536 bacteria as well as succinate dehydrogenase subunits were also predicted to lose essentiality  
537 for *V. cholerae* growth when co-cultured with *E. coli*. Taken together, our *in silico* predictions of  
538 variations in essentiality between single and co-culture settings highlight the importance of  
539 considering both scenarios when prioritising druggable targets for downstream validation.

540

## 541 Discussion

542 Using integrated metabolic modeling, *in vitro* culturing and transcriptomics, we investigated the  
543 growth phenotypes and single gene essentiality variations of a representative human pathogen,  
544 *V. cholerae*, when implicated in single or co-infections. We found that *V. cholerae* growth is  
545 enhanced in co-infection scenarios with ETEC. Our modeling procedures explained this  
546 increase in *V. cholerae* growth by an expansion in its metabolic capabilities through cross-fed  
547 metabolites enabled by ETEC, reproducing observed behavior in patients with dual infections by  
548 the two enteric pathogens. We further predicted a core set of essential genes that are critical for  
549 *V. cholerae* growth whether it is implicated in single or dual infections with ETEC.

550

551 Our modeling approach allowed us to chart possible metabolites that can be cross-fed to *V.*  
552 *cholerae* through ETEC (see Table S5 at  
553 [https://github.com/alyamahmoud/coinfection\\_modeling/blob/master/supplementary\\_material/supplementary\\_tables.xlsx](https://github.com/alyamahmoud/coinfection_modeling/blob/master/supplementary_material/supplementary_tables.xlsx) ). Cross-feeding, in which one species produces metabolites consumed  
554 by another, has been shown more than often to be adopted by co-existing species across  
555 diverse environments<sup>17,18,56,78</sup>. Questions like: whether the release of cross-fed metabolites or  
556 byproducts would enhance or enable the growth of other species or whether it will be costless or  
557 associated with reduced fitness of the producer, are not usually clear. Such questions become  
558 of even greater importance when it comes to pathogens since this will have direct impact on the  
559 dosage and spectrum of used antibiotics. Our integrative approach provides insights into how to  
560 arrive at primary answers to similar questions that should direct future experimental work.

561

562  
563 A large fraction of *V. cholerae* essential genome (36%) (see supplementary text at  
564 [https://github.com/alyamahmoud/coinfection\\_modeling/blob/master/supplementary\\_material/supplementary\\_text.docx](https://github.com/alyamahmoud/coinfection_modeling/blob/master/supplementary_material/supplementary_text.docx) for details) consists of metabolic functions spanning several processes  
565 including cell wall biosynthesis, lipid metabolism, and cofactor biosynthesis<sup>25-27</sup>. Most essential  
566 genes for *V. cholerae* growth whether it is causing single- or co-infections were also involved in  
567 cofactor biosynthesis. Interestingly, cofactor-use-efficient pathways were often favored by  
568 organisms that depend on simple carbon sources under anaerobic conditions<sup>79</sup> resembling  
569 growth conditions in the intestine<sup>53,80</sup> where *V. cholerae* and ETEC establish their infection. The  
570 application of this work is of immediate relevance for the choice of antibiotics used in case of  
571 single- or polymicrobial infections. Strategies that depend on an increase in dosage of one drug  
572

573 or combining drugs of known efficacy against individual species might not necessarily work  
574 when two or more pathogens are operating together. Our findings indicate that the essential  
575 transcriptome of *V. cholerae* is distinct during co-infection compared to single-infection and  
576 highlight the importance of studying pathogen gene essentiality in polymicrobial infections.  
577 While replacement fluids are the main treatment line for cholerae infections, antibiotics are  
578 frequently used to lessen the diarrheal purging, decrease the need for rehydration fluids and  
579 shorten the recovery time<sup>23</sup>. For other human pathogens however, antibiotics are the main stay  
580 and we envision that our framework can be applied to other pathogens and their most frequently  
581 reported co-infecting partners. We believe that such an integrative approach could be routinely  
582 integrated as part of drug target development pipelines.

583  
584 An integral part of constraint-based modeling relies on reconciling differences that arise  
585 between modeling and experiments<sup>10-12,81</sup>. In our case, co-infection models' simulations  
586 predicted an increase in *V. cholerae* growth rate coupled to almost no-impact on ETEC growth  
587 capabilities. This is in line with recent studies showing that most organisms secrete a broad  
588 distribution of metabolically useful compounds without cost in a variety of environmental  
589 conditions<sup>56</sup>. However, our *in vitro* co-culture experiments revealed a significant decrease in  
590 ETEC growth rate leading us to conclude, in light of existing literature<sup>57</sup>, that the suppression in  
591 ETEC growth is potentially mediated by non-metabolic factors that are not captured by our  
592 GEMs.

593  
594 Although our approach is based on computational predictions and *in vitro* experiments which  
595 definitely do not fully recapitulate *in vivo* conditions, our growth phenotype, predicted by co-  
596 culture models and *in vitro* co-cultures, matched observed behavior in patients presenting with  
597 diarrhea while being co-infected with both *V. cholerae* and ETEC showing higher antibody titers  
598 against cholera toxin relative to patients infected with *V. cholerae* only<sup>34</sup>. Nevertheless, we  
599 realize that there are other processes that are not accounted for even after integrating data from  
600 various sources within the current approach. For instance, the fact that our metabolic model  
601 could not predict the decrease in ETEC growth rate implies that this effect is probably mediated  
602 by a non-metabolic factor that is not captured by the metabolic models as such. Future models,  
603 building upon the present reconstruction, can expand the modeling scope to account for  
604 synthesis and secretion of *V. cholerae* virulence factors<sup>6-9</sup> in an attempt to investigate how the  
605 metabolic network of *V. cholerae* impacts the synthesis of its virulence factors. Co-culture  
606 experiments create an artificial community in a controlled environment and thus provide ideal  
607 conditions to test ecological concepts concerning community stability and dynamics that cannot  
608 easily be measured in macro-ecological complex systems<sup>82</sup>. However, most parts of the human  
609 intestine are hypoxic, vary in pH level<sup>53,80</sup>, and are inhabited by diverse sets of commensal  
610 microbes which are not accounted for when solely depending on *in vitro* experiments. Current  
611 predictions and experiments thus do not capture several of these factors including temperature,  
612 pH changes, signaling, gene regulation, serotype differences, and co-existing commensal  
613 microbes (which may account for the absence of the *V. cholerae* growth phenotype when using  
614 solid agar or spent media for co-infection modeling, see Figures S5-S6 and supplementary text  
615 at

616 [https://github.com/alyamahmoud/coinfection\\_modeling/blob/master/supplementary\\_material/supplementary\\_text.docx](https://github.com/alyamahmoud/coinfection_modeling/blob/master/supplementary_material/supplementary_text.docx) or details).

618  
619 Our study investigates a synthetic enteric pathogens community with a combination of *in vitro*  
620 single- and co-cultures, mechanistic modeling and gene expression analysis. Constraint-based  
621 modeling approaches, which can take emergent metabolism into account<sup>37</sup>, require high-quality  
622 metabolic reconstructions for each community member, which take months of curation effort to  
623 obtain<sup>83</sup>. However, the modular nature of the modeling approach followed here implies that such  
624 approaches can be scaled up to simulate polymicrobial infections as well as co-existing  
625 commensal microbes to further prioritize druggable targets that would be effective in even  
626 broader range of infection conditions and complex ecosystems. Collectively, this work illustrates  
627 the importance of harnessing the power of integrative predictive modeling coupled with co-  
628 culture experiments to recognize potential amplification in a pathogen's growth capabilities a  
629 priori which could contribute to downstream therapeutic and management options.

630

### 631 **Methods**

632 The methods employed for the reconstruction, simulation, and analyses presented in this  
633 manuscript are briefly summarized below, with further details regarding the procedures,  
634 protocols, calculations, and quality control measures provided in the supplementary material. All  
635 supplementary tables are available as part of a github repository at :  
636 [https://github.com/alyamahmoud/coinfection\\_modeling](https://github.com/alyamahmoud/coinfection_modeling).

637

### 638 **Growth assays and CFU measurements**

639 Bacterial strains were grown in M9 (Sigma Aldrich) minimal medium supplemented with 0.5 %  
640 glucose, 1 mM magnesium sulphate and 0.1 mM calcium chloride, unless otherwise specified.  
641 *V. cholerae* V52 (O37 serogroup) and the enterotoxigenic *Escherichia coli* strains (ETEC E616  
642 and ETEC E36) were a kind gift from Prof. Sun Nyunt Wai, Umeå University, Sweden. *V.*  
643 *cholerae* and ETEC were grown either individually (mono-cultures – V52, E616 and E36) or in  
644 combination (co-cultures – V52/E616 and V52/E36) at 37 °C at 200 rpm. Co-cultures were  
645 started with equal concentrations of each strain. The absorbance (OD<sub>600</sub>) was measured every  
646 1h over a period of 7h for the growth curve measurements. Simultaneously, at every hour, an  
647 aliquot was taken from each culture flask, serially diluted and 5µL were spotted (three technical  
648 replicates) on agar plates containing appropriate antibiotics (100µg/mL of rifampicin or 15µg/mL  
649 of tetracycline). V52 mono-cultures were spotted on rifampicin plates whereas ETEC E616 and  
650 E36 mono-cultures were spotted on tetracycline plates. Following, all co-cultures were spotted  
651 on both sets of antibiotic plates to distinguish between the individual strains during co-cultures.  
652 All plates were incubated for a period of 12-16h at 37 °C after which the colonies were counted  
653 and the CFU/mL value was calculated.

654

### 655 **DNA extraction, sequencing and genome assembly**

656 Genomic DNA and plasmids (in case of ETEC) were extracted from bacterial cells for the  
657 purpose of whole genome sequencing. *V. cholerae* and ETEC cells (mono-cultures) were  
658 inoculated in rich LB (Sigma Aldrich) medium and grown at 37 °C at 200 rpm until stationary  
659 phase. Subsequently cells were harvested and lysed and the genomic DNA was extracted using

660 the DNeasy® Blood & Tissue Kit (Qiagen), according to manufacturer's instructions. Plasmid  
661 DNA from both the ETEC strains was additionally isolated using the Gene Jet Plasmid Miniprep  
662 Kit (Thermo Scientific) by following the manufacturer's instructions.

663  
664 Genome sequences were assembled using SPAdes<sup>84</sup> for *V. cholerae* V52 and SPAdes and  
665 plasmidSPAdes<sup>85</sup> for ETEC E616 and ETEC E36. PATRIC<sup>60</sup> and eggNOG mapper<sup>86</sup> were used  
666 for genome annotation.

### 667 668 **Reconstruction of *V. cholerae* GEM, iAM-Vc960**

669 A list of metabolic pathways in *V. cholerae* V52 was built based on the genome annotation  
670 generated in this study as well as those available in PATRIC and that of *V. cholerae* O1 N16961  
671 (see Table S1 at  
672 [https://github.com/alyamahmoud/coinfection\\_modeling/blob/master/supplementary\\_material/sup](https://github.com/alyamahmoud/coinfection_modeling/blob/master/supplementary_material/supplementary_tables.xlsx)  
673 [plementary\\_tables.xlsx](https://github.com/alyamahmoud/coinfection_modeling/blob/master/supplementary_material/supplementary_tables.xlsx)). The reconstruction was converted into a model and the stoichiometric  
674 matrix was constructed with mass and charge balanced reactions in the standard fashion using  
675 the COBRA toolbox v.3.0.<sup>36</sup> Flux balance analysis was used to assess network characteristics  
676 and perform simulations<sup>37</sup>. We used *iJO1366*<sup>38</sup> as a starting point for reconstruction efforts  
677 which is a common practice to use the closest available species as a starting template<sup>13,14</sup> while  
678 keeping only reactions for which evidence exists to be present in *V. cholerae* genome and/or  
679 transcriptome (see Table S1 at  
680 [https://github.com/alyamahmoud/coinfection\\_modeling/blob/master/supplementary\\_material/sup](https://github.com/alyamahmoud/coinfection_modeling/blob/master/supplementary_material/supplementary_tables.xlsx)  
681 [plementary\\_tables.xlsx](https://github.com/alyamahmoud/coinfection_modeling/blob/master/supplementary_material/supplementary_tables.xlsx)). We also built an objective biomass function based on *iJO1366* and *V.*  
682 *vulnificus*<sup>7</sup> previously reconstructed GEMs. Additional reaction content was added from KEGG,  
683 and BIOCYC databases. All reactions added were manually curated according to a published  
684 protocol<sup>83</sup>. *iAM-Vc960* was assessed for mass balance<sup>83</sup>. Metabolites charges and formulae  
685 were obtained from BiGG<sup>87</sup> and updated in *iAM-Vc960* to mass-balance the respective  
686 reactions. All reconstruction, refinement, validation and simulations using all models in this  
687 study were done using the COBRA toolbox<sup>36</sup> (v3.0.) and Matlab-R2016b. Please refer to section  
688 "Refinement of *iAM-Vc960*" in the supplementary text at  
689 [https://github.com/alyamahmoud/coinfection\\_modeling/blob/master/supplementary\\_material/sup](https://github.com/alyamahmoud/coinfection_modeling/blob/master/supplementary_material/supplementary_text.docx)  
690 [plementary\\_text.docx](https://github.com/alyamahmoud/coinfection_modeling/blob/master/supplementary_material/supplementary_text.docx) for more details on the curation steps of *iAM-Vc960*.

### 691 692 **Validation of *iAM-Vc960* single gene deletion essentiality predictions**

693 We downloaded gene essentiality data for *V. cholerae* O1 str. C6706 from the Online GENE  
694 Essentiality (OGEE) database<sup>4,5</sup>. In total, 3886 genes (total number of ORFs identified in *V.*  
695 *cholerae*) were tested for essentiality. 458 genes were essential, 148 were essential for fitness,  
696 3144 were non-essential and 136 were unknown. Out of the 458 essential genes, 145 were  
697 metabolic genes and were already in *iAM-Vc960*. *iAM-Vc960* predicted 94 of those to be  
698 essential while the remaining 51 were falsely predicted by the model as non-essential. For the  
699 non-essential genes, 758 of those were already in *iAM-Vc960*. The model could predict 693 as  
700 non-essential while 65 were falsely predicted by the model as essential. The overall accuracy of  
701 the model predicted single gene essentiality was 87% (Figure 2C). This discrepancy between  
702 the model predictions and the OGEE dataset, the high confidence set that we used earlier and  
703 assuming low experimental error rate, indicates that the reconstructed *V. cholerae* reactome is



704 incomplete and that there is further room for improvement and refinement of the *iAM-Vc960*  
705 representing opportunities for new biological discoveries.

706

### 707 **Metabolic modeling of co-infection of *V. cholerae* and ETEC**

708 To simulate co-infection, individual species models were combined into a community model  
709 where each species would interact with a common external metabolic environment through their  
710 metabolite exchange reactions<sup>58,59</sup>. This allowed each species to access the pool of  
711 media/infection site metabolites as well as metabolites that are released/uptaken by the other  
712 pathogen. Each species could secrete/uptake only those metabolites for which an exchange  
713 reaction (e.g. via transporters or free diffusion) exists in the model. The widely-employed FBA  
714 objective of biomass maximization<sup>37</sup> was replaced with the maximization of a weighted sum of  
715 the biomass production fluxes for the community members<sup>88</sup>, i.e. the objective function was set  
716 to maximize the biomass function of each pathogen, simulating growth at 1:1 species  
717 composition/abundance. Flux balance analysis (FBA) was performed using open CORBA in  
718 Matlab 2016b, and the Gurobi solver v7.0. Please refer to section “Quality control of the co-  
719 culture model *iCo-Culture2993*” in the supplementary text for more details on the curation of the  
720 co-culture model.

721

### 722 **Catabolic capabilities of *V. cholerae*, ETEC and co-infection GEMs**

723 Growth in 656 different growth supporting conditions was simulated for *iAM-Vc960*, *iETEC1333*  
724 and *iCo-Culture* and then compared to identical simulation conditions for 55 GEMs of *E. coli* and  
725 *Shigella*<sup>13</sup>. Table S4 at  
726 [https://github.com/alyamahmoud/coinfection\\_modeling/blob/master/supplementary\\_material/supplementary\\_tables.xlsx](https://github.com/alyamahmoud/coinfection_modeling/blob/master/supplementary_material/supplementary_tables.xlsx)  
727 details the simulation conditions for the alternative nutrient sources and  
728 Table S5 at  
729 [https://github.com/alyamahmoud/coinfection\\_modeling/blob/master/supplementary\\_material/supplementary\\_tables.xlsx](https://github.com/alyamahmoud/coinfection_modeling/blob/master/supplementary_material/supplementary_tables.xlsx)  
730 shows all simulated growth conditions. Nutrient sources with growth  
731 rates above 0.01 were classified as growth supporting, whereas nutrient sources with growth  
732 rates less than 0.01 were classified as non-growth supporting. The binary results from the  
733 growth/no growth simulations were used to reconstruct the heatmap (Figure 3C). Ward’s  
734 agglomerative clustering of the matrix of correlations was used to cluster the species. The  
735 heatmap was visualized using the [pheatmap](#) R package. The ternary plot (Figure 4B) was  
736 visualized using the ggtern R package<sup>89</sup>.

737

738

### 739 **RNA Extraction, Sequencing and Data Analysis**

740 Sampling of cells for the purpose of RNA extraction was performed as follows: Bacterial cells  
741 (mono-cultures and co-cultures of *V. cholerae* and ETEC) were grown to mid logarithmic phase  
742 in shake flasks at 37 °C at 200 rpm. In case of the co-cultures, equal concentrations of  
743 individual mono-cultures were inoculated into the same medium from the start. Once the  
744 appropriate growth phase was reached, the cells were harvested. RNA was extracted from the  
745 harvested cells using the RNeasy<sup>®</sup>Mini Kit (Qiagen), according to manufacturer’s instructions.  
746 Experiments were carried out in triplicates. The RNA extracted was in the range of 200 – 100  
747 ng/μL.

748

749 RNAseq reads from mono-cultures were directly aligned to the genome assembly of the  
750 corresponding species. To check for reads cross mapping, we first attempted to map *V.*  
751 *cholerae* reads against ETEC genome assembly and vice versa. In either case, the percentage  
752 of mapped reads was < 2% (see Figure S4 at  
753 [https://github.com/alyamahmoud/coinfection\\_modeling/blob/master/supplementary\\_material/sup](https://github.com/alyamahmoud/coinfection_modeling/blob/master/supplementary_material/supplementary_text.docx)  
754 [plementary\\_text.docx](https://github.com/alyamahmoud/coinfection_modeling/blob/master/supplementary_material/supplementary_text.docx)) indicating minimal cross-mapping between the two species. Following,  
755 we constructed an artificial genome assembly of both *V. cholerae* and ETEC combined, i.e.  
756 representing the co-culture as a single entity by merging the genome assemblies of the two  
757 species. PATRIC<sup>60</sup> was used for annotation of the merged genome assembly. *V. cholerae* and  
758 ETEC reads from the co-culture were then each separately aligned against the merged genome  
759 assembly and read counts were computed, i.e. we sequenced and annotated the genome  
760 sequences from the single and dual cultures using the same assembly and annotation pipeline  
761 to avoid differential gene calling. Although all strains used in this study (*V. cholerae* V52, ETEC  
762 E36 & E616) are clinical isolates that have been sequenced and characterized before<sup>62,63</sup>, we  
763 have generated new assemblies and annotations mainly for the sake of consistency for gene  
764 calling where we subjected the mono- and co-culture transcriptomes to the same processing  
765 and annotation pipelines. Bowtie2<sup>90</sup> was used for all genome alignment. Read counts for all  
766 genes were extracted with HTSeq-count<sup>91</sup>, normalized and analysed using the R package  
767 DESeq2<sup>92</sup>. In order to do differential expression analysis between the genome assemblies  
768 generated from the mono cultures and the co-cultures, we aggregated genes by their FIGfam  
769 IDs<sup>93</sup>. Members of a FIGfam, are believed to implement the same function, they are believed to  
770 derive from a common ancestor, and they can be globally aligned. We wanted to see if there are  
771 specific functions that will be significantly altered between the two culture conditions especially  
772 that the sequence identity between ETEC and *V. cholerae* is around 80%<sup>43</sup>. FIGfam IDs were  
773 aggregated by keeping the FIGfam ID with the maximum value of raw read counts across all  
774 replicates from both the mono- and co-cultures. GOstats<sup>94</sup> R package was used for the GO  
775 enrichment analysis and GOplot<sup>95</sup> R package was used for visualization of GO enrichment  
776 results in Figure 5. The details of procedure for dual RNAseq data analysis are outlined in  
777 Figure S4 and in the supplementary text at  
778 [https://github.com/alyamahmoud/coinfection\\_modeling/blob/master/supplementary\\_material/sup](https://github.com/alyamahmoud/coinfection_modeling/blob/master/supplementary_material/supplementary_text.docx)  
779 [plementary\\_text.docx](https://github.com/alyamahmoud/coinfection_modeling/blob/master/supplementary_material/supplementary_text.docx) and code at the github repository at  
780 [https://github.com/alyamahmoud/coinfection\\_modeling](https://github.com/alyamahmoud/coinfection_modeling).

781

## 782 **Data availability**

783 All data generated in this study are included in this published article. Models, supplementary  
784 test and supplementary tables as well as code to reproduce the main figures and key analyses  
785 in this study are available as part of a github repository at  
786 [https://github.com/alyamahmoud/coinfection\\_modeling](https://github.com/alyamahmoud/coinfection_modeling).

787

## 788 **Acknowledgements**

789 We are very grateful to insightful comments from Dr Nathan Lewis and Dr Neema Jamshidi. We  
790 thank Dr Abdallah Abdallah and Mohammed Alarawi from the bioscience core lab at KAUST, Dr  
791 Hajime Ohyanagi and Dr Yoshi Saito for helpful discussions. This research was supported by

792 funding from KAUST: BAS/1/1624-01-01, BAS/1/1059-01-01 and SEED funding: FCS/1/2448-  
793 01-01 (AM, XG, TG, and KM) as well as by grants from the Novo Nordisk Foundation (IM, VR),  
794 the Swedish national research council (VR) and the Danish national research council (DFF)  
795 (IM).

796

### 797 **Author contributions**

798 AM performed the modeling, simulations, data analysis, and wrote the paper. VR performed the  
799 experiments. BJ provided support for the modeling and data analysis. JN provided support for  
800 the modeling. KM provided support for the DNA and RNA sequencing. XG contributed to data  
801 analysis. IM and TG conceived the project, oversaw the project and wrote the paper. All authors  
802 read and approved the final manuscript.

803

### 804 **Competing interests**

805 The authors declare no competing interests.

806

### 807 **References**

- 808 1 Ibberson, C. B., Stacy, A., Fleming, D., Dees, J. L., Rumbaugh, K., Gilmore, M. S. &  
809 Whiteley, M. Co-infecting microorganisms dramatically alter pathogen gene essentiality  
810 during polymicrobial infection. *Nat Microbiol* **2**, 17079, doi:10.1038/nmicrobiol.2017.79  
811 (2017).
- 812 2 Zhang, R., Ou, H. Y. & Zhang, C. T. DEG: a database of essential genes. *Nucleic Acids*  
813 *Res* **32**, D271-272, doi:10.1093/nar/gkh024 (2004).
- 814 3 Gerdes, S., Edwards, R., Kubal, M., Fonstein, M., Stevens, R. & Osterman, A. Essential  
815 genes on metabolic maps. *Curr Opin Biotechnol* **17**, 448-456,  
816 doi:10.1016/j.copbio.2006.08.006 (2006).
- 817 4 Chen, W. H., Lu, G., Chen, X., Zhao, X. M. & Bork, P. OGEE v2: an update of the online  
818 gene essentiality database with special focus on differentially essential genes in human  
819 cancer cell lines. *Nucleic Acids Res* **45**, D940-D944, doi:10.1093/nar/gkw1013 (2017).
- 820 5 Chen, W. H., Minguetz, P., Lercher, M. J. & Bork, P. OGEE: an online gene essentiality  
821 database. *Nucleic Acids Res* **40**, D901-906, doi:10.1093/nar/gkr986 (2012).
- 822 6 Bogard, R. W., Davies, B. W. & Mekalanos, J. J. MetR-regulated *Vibrio cholerae*  
823 metabolism is required for virulence. *MBio* **3**, doi:10.1128/mBio.00236-12 (2012).
- 824 7 Kim, H. U., Kim, S. Y., Jeong, H., Kim, T. Y., Kim, J. J., Choy, H. E., Yi, K. Y., Rhee, J.  
825 H. & Lee, S. Y. Integrative genome-scale metabolic analysis of *Vibrio vulnificus* for drug  
826 targeting and discovery. *Mol Syst Biol* **7**, 460, doi:10.1038/msb.2010.115 (2011).
- 827 8 Fouts, D. E., Matthias, M. A., Adhikarla, H., Adler, B., Amorim-Santos, L., Berg, D. E.,  
828 Bulach, D., Buschiazzi, A., Chang, Y. F., Galloway, R. L., Haake, D. A., Haft, D. H.,  
829 Hartskeerl, R., Ko, A. I., Levett, P. N., Matsunaga, J., Mechaly, A. E., Monk, J. M.,  
830 Nascimento, A. L., Nelson, K. E., Palsson, B., Peacock, S. J., Picardeau, M., Ricaldi, J.  
831 N., Thaipandungpanit, J., Wunder, E. A., Jr., Yang, X. F., Zhang, J. J. & Vinetz, J. M.  
832 What Makes a Bacterial Species Pathogenic?: Comparative Genomic Analysis of the  
833 Genus *Leptospira*. *PLoS Negl Trop Dis* **10**, e0004403, doi:10.1371/journal.pntd.0004403  
834 (2016).
- 835 9 Bartell, J. A., Blazier, A. S., Yen, P., Thogersen, J. C., Jelsbak, L., Goldberg, J. B. &  
836 Papin, J. A. Reconstruction of the metabolic network of *Pseudomonas aeruginosa* to  
837 interrogate virulence factor synthesis. *Nat Commun* **8**, 14631,  
838 doi:10.1038/ncomms14631 (2017).

- 839 10 Lewis, N. E., Nagarajan, H. & Palsson, B. O. Constraining the metabolic genotype-  
840 phenotype relationship using a phylogeny of in silico methods. *Nat Rev Microbiol* **10**,  
841 291-305, doi:10.1038/nrmicro2737 (2012).
- 842 11 Bordbar, A., Monk, J. M., King, Z. A. & Palsson, B. O. Constraint-based models predict  
843 metabolic and associated cellular functions. *Nat Rev Genet* **15**, 107-120,  
844 doi:10.1038/nrg3643 (2014).
- 845 12 O'Brien, E. J., Monk, J. M. & Palsson, B. O. Using Genome-scale Models to Predict  
846 Biological Capabilities. *Cell* **161**, 971-987, doi:10.1016/j.cell.2015.05.019 (2015).
- 847 13 Monk, J. M., Charusanti, P., Aziz, R. K., Lerman, J. A., Premyodhin, N., Orth, J. D.,  
848 Feist, A. M. & Palsson, B. O. Genome-scale metabolic reconstructions of multiple  
849 Escherichia coli strains highlight strain-specific adaptations to nutritional environments.  
850 *Proc Natl Acad Sci U S A* **110**, 20338-20343, doi:10.1073/pnas.1307797110 (2013).
- 851 14 Seif, Y., Kavvas, E., Lachance, J. C., Yurkovich, J. T., Nuccio, S. P., Fang, X., Catoiu,  
852 E., Raffatellu, M., Palsson, B. O. & Monk, J. M. Genome-scale metabolic reconstructions  
853 of multiple Salmonella strains reveal serovar-specific metabolic traits. *Nat Commun* **9**,  
854 3771, doi:10.1038/s41467-018-06112-5 (2018).
- 855 15 Monk, J. M., Lloyd, C. J., Brunk, E., Mih, N., Sastry, A., King, Z., Takeuchi, R., Nomura,  
856 W., Zhang, Z., Mori, H., Feist, A. M. & Palsson, B. O. iML1515, a knowledgebase that  
857 computes Escherichia coli traits. *Nat Biotechnol* **35**, 904-908, doi:10.1038/nbt.3956  
858 (2017).
- 859 16 Mendes-Soares, H., Mundy, M., Soares, L. M. & Chia, N. MMinte: an application for  
860 predicting metabolic interactions among the microbial species in a community. *BMC*  
861 *Bioinformatics* **17**, 343, doi:10.1186/s12859-016-1230-3 (2016).
- 862 17 Ponomarova, O. & Patil, K. R. Metabolic interactions in microbial communities:  
863 untangling the Gordian knot. *Curr Opin Microbiol* **27**, 37-44,  
864 doi:10.1016/j.mib.2015.06.014 (2015).
- 865 18 Wintermute, E. H. & Silver, P. A. Emergent cooperation in microbial metabolism. *Mol*  
866 *Syst Biol* **6**, 407, doi:10.1038/msb.2010.66 (2010).
- 867 19 Stolyar, S., Van Dien, S., Hillesland, K. L., Pinel, N., Lie, T. J., Leigh, J. A. & Stahl, D. A.  
868 Metabolic modeling of a mutualistic microbial community. *Mol Syst Biol* **3**, 92,  
869 doi:10.1038/msb4100131 (2007).
- 870 20 Kreimer, A., Doron-Faigenboim, A., Borenstein, E. & Freilich, S. NetCmpt: a network-  
871 based tool for calculating the metabolic competition between bacterial species.  
872 *Bioinformatics* **28**, 2195-2197, doi:10.1093/bioinformatics/bts323 (2012).
- 873 21 Klitgord, N. & Segre, D. Environments that induce synthetic microbial ecosystems. *PLoS*  
874 *Comput Biol* **6**, e1001002, doi:10.1371/journal.pcbi.1001002 (2010).
- 875 22 Freilich, S., Zarecki, R., Eilam, O., Segal, E. S., Henry, C. S., Kupiec, M., Gophna, U.,  
876 Sharan, R. & Ruppin, E. Competitive and cooperative metabolic interactions in bacterial  
877 communities. *Nat Commun* **2**, 589, doi:10.1038/ncomms1597 (2011).
- 878 23 Sack, D. A., Sack, R. B., Nair, G. B. & Siddique, A. K. Cholera. *Lancet* **363**, 223-233  
879 (2004).
- 880 24 De Nisco, N. J., Rivera-Cancel, G. & Orth, K. The Biochemistry of Sensing: Enteric  
881 Pathogens Regulate Type III Secretion in Response to Environmental and Host Cues.  
882 *MBio* **9**, doi:10.1128/mBio.02122-17 (2018).
- 883 25 Clemens, J. D., Nair, G. B., Ahmed, T., Qadri, F. & Holmgren, J. Cholera. *Lancet* **390**,  
884 1539-1549, doi:10.1016/S0140-6736(17)30559-7 (2017).
- 885 26 Van der Henst, C., Vanhove, A. S., Drebes Dorr, N. C., Stutzmann, S., Stoudmann, C.,  
886 Clerc, S., Scignari, T., Maclachlan, C., Knott, G. & Blokesch, M. Molecular insights into  
887 Vibrio cholerae's intra-amoebal host-pathogen interactions. *Nat Commun* **9**, 3460,  
888 doi:10.1038/s41467-018-05976-x (2018).

- 889 27 Cava, F. Biology of *Vibrio cholerae*. Editorial overview. *Int Microbiol* **20**, 105,  
890 doi:10.2436/20.1501.01.290 (2017).
- 891 28 Moisi, M., Lichtenegger, S., Tutz, S., Seper, A., Schild, S. & Reidl, J. Characterizing the  
892 hexose-6-phosphate transport system of *Vibrio cholerae*, a utilization system for carbon  
893 and phosphate sources. *J Bacteriol* **195**, 1800-1808, doi:10.1128/JB.01952-12 (2013).
- 894 29 Nelson, E. J., Harris, J. B., Morris, J. G., Jr., Calderwood, S. B. & Camilli, A. Cholera  
895 transmission: the host, pathogen and bacteriophage dynamic. *Nat Rev Microbiol* **7**, 693-  
896 702, doi:10.1038/nrmicro2204 (2009).
- 897 30 Minato, Y., Fassio, S. R., Wolfe, A. J. & Hase, C. C. Central metabolism controls  
898 transcription of a virulence gene regulator in *Vibrio cholerae*. *Microbiology* **159**, 792-802,  
899 doi:10.1099/mic.0.064865-0 (2013).
- 900 31 Miller, V. L. & Mekalanos, J. J. A novel suicide vector and its use in construction of  
901 insertion mutations: osmoregulation of outer membrane proteins and virulence  
902 determinants in *Vibrio cholerae* requires *toxR*. *J Bacteriol* **170**, 2575-2583 (1988).
- 903 32 Patra, T., Koley, H., Ramamurthy, T., Ghose, A. C. & Nandy, R. K. The Entner-  
904 Doudoroff pathway is obligatory for gluconate utilization and contributes to the  
905 pathogenicity of *Vibrio cholerae*. *J Bacteriol* **194**, 3377-3385, doi:10.1128/JB.06379-11  
906 (2012).
- 907 33 Salem, W., Leitner, D. R., Zingl, F. G., Schratte, G., Prassl, R., Goessler, W., Reidl, J. &  
908 Schild, S. Antibacterial activity of silver and zinc nanoparticles against *Vibrio cholerae*  
909 and enterotoxic *Escherichia coli*. *Int J Med Microbiol* **305**, 85-95,  
910 doi:10.1016/j.ijmm.2014.11.005 (2015).
- 911 34 Chowdhury, F., Begum, Y. A., Alam, M. M., Khan, A. I., Ahmed, T., Bhuiyan, M. S.,  
912 Harris, J. B., LaRocque, R. C., Faruque, A. S., Endtz, H., Ryan, E. T., Cravioto, A.,  
913 Svennerholm, A. M., Calderwood, S. B. & Qadri, F. Concomitant enterotoxigenic  
914 *Escherichia coli* infection induces increased immune responses to *Vibrio cholerae* O1  
915 antigens in patients with cholera in Bangladesh. *Infect Immun* **78**, 2117-2124,  
916 doi:10.1128/IAI.01426-09 (2010).
- 917 35 Qadri, F., Khan, A. I., Faruque, A. S., Begum, Y. A., Chowdhury, F., Nair, G. B., Salam,  
918 M. A., Sack, D. A. & Svennerholm, A. M. Enterotoxigenic *Escherichia coli* and *Vibrio*  
919 *cholerae* diarrhea, Bangladesh, 2004. *Emerg Infect Dis* **11**, 1104-1107,  
920 doi:10.3201/eid1107.041266 (2005).
- 921 36 Heirendt, L., Arreckx, S., Pfau, T., Mendoza, S. N., Richelle, A., Heinken, A.,  
922 Haraldsdottir, H. S., Wachowiak, J., Keating, S. M., Vlasov, V., Magnusdottir, S., Ng, C.  
923 Y., Preciat, G., Zagare, A., Chan, S. H. J., Aurich, M. K., Clancy, C. M., Modamio, J.,  
924 Sauls, J. T., Noronha, A., Bordbar, A., Cousins, B., El Assal, D. C., Valcarcel, L. V.,  
925 Apaolaza, I., Ghaderi, S., Ahookhosh, M., Ben Guebila, M., Kostromins, A., Sompairac,  
926 N., Le, H. M., Ma, D., Sun, Y., Wang, L., Yurkovich, J. T., Oliveira, M. A. P., Vuong, P.  
927 T., El Assal, L. P., Kuperstein, I., Zinovyev, A., Hinton, H. S., Bryant, W. A., Aragon  
928 Artacho, F. J., Planes, F. J., Stalidzans, E., Maass, A., Vempala, S., Hucka, M.,  
929 Saunders, M. A., Maranas, C. D., Lewis, N. E., Sauter, T., Palsson, B. O., Thiele, I. &  
930 Fleming, R. M. T. Creation and analysis of biochemical constraint-based models using  
931 the COBRA Toolbox v.3.0. *Nat Protoc* **14**, 639-702, doi:10.1038/s41596-018-0098-2  
932 (2019).
- 933 37 Orth, J. D., Thiele, I. & Palsson, B. O. What is flux balance analysis? *Nat Biotechnol* **28**,  
934 245-248, doi:10.1038/nbt.1614 (2010).
- 935 38 Orth, J. D., Conrad, T. M., Na, J., Lerman, J. A., Nam, H., Feist, A. M. & Palsson, B. O.  
936 A comprehensive genome-scale reconstruction of *Escherichia coli* metabolism--2011.  
937 *Mol Syst Biol* **7**, 535, doi:10.1038/msb.2011.65 (2011).
- 938 39 Buchel, F., Rodriguez, N., Swainston, N., Wrzodek, C., Czauderna, T., Keller, R., Mittag,  
939 F., Schubert, M., Glont, M., Golebiewski, M., van Iersel, M., Keating, S., Rall, M.,

- 940 Wybrow, M., Hermjakob, H., Hucka, M., Kell, D. B., Muller, W., Mendes, P., Zell, A.,  
941 Chaouiya, C., Saez-Rodriguez, J., Schreiber, F., Laibe, C., Drager, A. & Le Novere, N.  
942 Path2Models: large-scale generation of computational models from biochemical pathway  
943 maps. *BMC Syst Biol* **7**, 116, doi:10.1186/1752-0509-7-116 (2013).
- 944 40 Henry, C. S., DeJongh, M., Best, A. A., Frybarger, P. M., Linsay, B. & Stevens, R. L.  
945 High-throughput generation, optimization and analysis of genome-scale metabolic  
946 models. *Nat Biotechnol* **28**, 977-982, doi:10.1038/nbt.1672 (2010).
- 947 41 Soler-Bistue, A., Mondotte, J. A., Bland, M. J., Val, M. E., Saleh, M. C. & Mazel, D.  
948 Genomic location of the major ribosomal protein gene locus determines *Vibrio cholerae*  
949 global growth and infectivity. *PLoS Genet* **11**, e1005156,  
950 doi:10.1371/journal.pgen.1005156 (2015).
- 951 42 Goodall, E. C. A., Robinson, A., Johnston, I. G., Jabbari, S., Turner, K. A., Cunningham,  
952 A. F., Lund, P. A., Cole, J. A. & Henderson, I. R. The Essential Genome of *Escherichia*  
953 *coli* K-12. *MBio* **9**, doi:10.1128/mBio.02096-17 (2018).
- 954 43 Chao, M. C., Pritchard, J. R., Zhang, Y. J., Rubin, E. J., Livny, J., Davis, B. M. & Waldor,  
955 M. K. High-resolution definition of the *Vibrio cholerae* essential gene set with hidden  
956 Markov model-based analyses of transposon-insertion sequencing data. *Nucleic Acids*  
957 *Res* **41**, 9033-9048, doi:10.1093/nar/gkt654 (2013).
- 958 44 Cameron, D. E., Urbach, J. M. & Mekalanos, J. J. A defined transposon mutant library  
959 and its use in identifying motility genes in *Vibrio cholerae*. *Proc Natl Acad Sci U S A* **105**,  
960 8736-8741, doi:10.1073/pnas.0803281105 (2008).
- 961 45 Kamp, H. D., Patimalla-Dipali, B., Lazinski, D. W., Wallace-Gadsden, F. & Camilli, A.  
962 Gene fitness landscapes of *Vibrio cholerae* at important stages of its life cycle. *PLoS*  
963 *Pathog* **9**, e1003800, doi:10.1371/journal.ppat.1003800 (2013).
- 964 46 Heidelberg, J. F., Eisen, J. A., Nelson, W. C., Clayton, R. A., Gwinn, M. L., Dodson, R.  
965 J., Haft, D. H., Hickey, E. K., Peterson, J. D., Umayam, L., Gill, S. R., Nelson, K. E.,  
966 Read, T. D., Tettelin, H., Richardson, D., Ermolaeva, M. D., Vamathevan, J., Bass, S.,  
967 Qin, H., Dragoi, I., Sellers, P., McDonald, L., Utterback, T., Fleishmann, R. D., Nierman,  
968 W. C., White, O., Salzberg, S. L., Smith, H. O., Colwell, R. R., Mekalanos, J. J., Venter,  
969 J. C. & Fraser, C. M. DNA sequence of both chromosomes of the cholera pathogen  
970 *Vibrio cholerae*. *Nature* **406**, 477-483, doi:10.1038/35020000 (2000).
- 971 47 Pfeffer, C. & Oliver, J. D. A comparison of thiosulphate-citrate-bile salts-sucrose (TCBS)  
972 agar and thiosulphate-chloride-iodide (TCI) agar for the isolation of *Vibrio* species from  
973 estuarine environments. *Lett Appl Microbiol* **36**, 150-151 (2003).
- 974 48 Davis, B. M. & Waldor, M. K. High-throughput sequencing reveals suppressors of *Vibrio*  
975 *cholerae* *rpoE* mutations: one fewer porin is enough. *Nucleic Acids Res* **37**, 5757-5767,  
976 doi:10.1093/nar/gkp568 (2009).
- 977 49 Amaral, G. R., Dias, G. M., Wellington-Oguri, M., Chimetto, L., Campeao, M. E.,  
978 Thompson, F. L. & Thompson, C. C. Genotype to phenotype: identification of diagnostic  
979 *vibrio* phenotypes using whole genome sequences. *Int J Syst Evol Microbiol* **64**, 357-  
980 365, doi:10.1099/ijs.0.057927-0 (2014).
- 981 50 Choopun, N., Louis, V., Huq, A. & Colwell, R. R. Simple procedure for rapid identification  
982 of *Vibrio cholerae* from the aquatic environment. *Appl Environ Microbiol* **68**, 995-998  
983 (2002).
- 984 51 WHO. Guidelines for drinking-water quality. (2017).
- 985 52 Bliven, K. A. & Maurelli, A. T. Antivirulence genes: insights into pathogen evolution  
986 through gene loss. *Infect Immun* **80**, 4061-4070, doi:10.1128/IAI.00740-12 (2012).
- 987 53 Bueno, E., Sit, B., Waldor, M. K. & Cava, F. Anaerobic nitrate reduction divergently  
988 governs population expansion of the enteropathogen *Vibrio cholerae*. *Nat Microbiol* **3**,  
989 1346-1353, doi:10.1038/s41564-018-0253-0 (2018).

- 990 54 Beyhan, S., Tischler, A. D., Camilli, A. & Yildiz, F. H. Transcriptome and phenotypic  
991 responses of *Vibrio cholerae* to increased cyclic di-GMP level. *J Bacteriol* **188**, 3600-  
992 3613, doi:10.1128/JB.188.10.3600-3613.2006 (2006).
- 993 55 Widder, S., Allen, R. J., Pfeiffer, T., Curtis, T. P., Wiuf, C., Sloan, W. T., Cordero, O. X.,  
994 Brown, S. P., Momeni, B., Shou, W., Kettle, H., Flint, H. J., Haas, A. F., Laroche, B.,  
995 Kreft, J. U., Rainey, P. B., Freilich, S., Schuster, S., Milferstedt, K., van der Meer, J. R.,  
996 Grobetakopf, T., Huisman, J., Free, A., Picioreanu, C., Quince, C., Klapper, I., Labarthe,  
997 S., Smets, B. F., Wang, H., Isaac Newton Institute, F. & Soyer, O. S. Challenges in  
998 microbial ecology: building predictive understanding of community function and  
999 dynamics. *ISME J* **10**, 2557-2568, doi:10.1038/ismej.2016.45 (2016).
- 1000 56 Pacheco, A. R., Moel, M. & Segre, D. Costless metabolic secretions as drivers of  
1001 interspecies interactions in microbial ecosystems. *Nat Commun* **10**, 103,  
1002 doi:10.1038/s41467-018-07946-9 (2019).
- 1003 57 MacIntyre, D. L., Miyata, S. T., Kitaoka, M. & Pukatzki, S. The *Vibrio cholerae* type VI  
1004 secretion system displays antimicrobial properties. *Proc Natl Acad Sci U S A* **107**,  
1005 19520-19524, doi:10.1073/pnas.1012931107 (2010).
- 1006 58 Zelezniak, A., Andrejev, S., Ponomarova, O., Mende, D. R., Bork, P. & Patil, K. R.  
1007 Metabolic dependencies drive species co-occurrence in diverse microbial communities.  
1008 *Proc Natl Acad Sci U S A* **112**, 6449-6454, doi:10.1073/pnas.1421834112 (2015).
- 1009 59 Ponomarova, O., Gabrielli, N., Sevin, D. C., Mulleder, M., Zirngibl, K., Bulyha, K.,  
1010 Andrejev, S., Kafkia, E., Typas, A., Sauer, U., Ralser, M. & Patil, K. R. Yeast Creates a  
1011 Niche for Symbiotic Lactic Acid Bacteria through Nitrogen Overflow. *Cell Syst* **5**, 345-357  
1012 e346, doi:10.1016/j.cels.2017.09.002 (2017).
- 1013 60 Wattam, A. R., Davis, J. J., Assaf, R., Boisvert, S., Brettin, T., Bun, C., Conrad, N.,  
1014 Dietrich, E. M., Disz, T., Gabbard, J. L., Gerdes, S., Henry, C. S., Kenyon, R. W., Machi,  
1015 D., Mao, C., Nordberg, E. K., Olsen, G. J., Murphy-Olson, D. E., Olson, R., Overbeek,  
1016 R., Parrello, B., Pusch, G. D., Shukla, M., Vonstein, V., Warren, A., Xia, F., Yoo, H. &  
1017 Stevens, R. L. Improvements to PATRIC, the all-bacterial Bioinformatics Database and  
1018 Analysis Resource Center. *Nucleic Acids Res* **45**, D535-D542, doi:10.1093/nar/gkw1017  
1019 (2017).
- 1020 61 UniProt, C. The universal protein resource (UniProt). *Nucleic Acids Res* **36**, D190-195,  
1021 doi:10.1093/nar/gkm895 (2008).
- 1022 62 von Mentzer, A., Connor, T. R., Wieler, L. H., Semmler, T., Iguchi, A., Thomson, N. R.,  
1023 Rasko, D. A., Joffre, E., Corander, J., Pickard, D., Wiklund, G., Svennerholm, A. M.,  
1024 Sjolung, A. & Dougan, G. Identification of enterotoxigenic *Escherichia coli* (ETEC) clades  
1025 with long-term global distribution. *Nat Genet* **46**, 1321-1326, doi:10.1038/ng.3145  
1026 (2014).
- 1027 63 Pukatzki, S., Ma, A. T., Sturtevant, D., Krastins, B., Sarracino, D., Nelson, W. C.,  
1028 Heidelberg, J. F. & Mekalanos, J. J. Identification of a conserved bacterial protein  
1029 secretion system in *Vibrio cholerae* using the *Dictyostelium* host model system. *Proc*  
1030 *Natl Acad Sci U S A* **103**, 1528-1533, doi:10.1073/pnas.0510322103 (2006).
- 1031 64 Gonzalez-Torres, P., Prysycz, L. P., Santos, F., Martinez-Garcia, M., Gabaldon, T. &  
1032 Anton, J. Interactions between closely related bacterial strains are revealed by deep  
1033 transcriptome sequencing. *Appl Environ Microbiol* **81**, 8445-8456,  
1034 doi:10.1128/AEM.02690-15 (2015).
- 1035 65 Aharonovich, D. & Sher, D. Transcriptional response of *Prochlorococcus* to co-culture  
1036 with a marine *Alteromonas*: differences between strains and the involvement of putative  
1037 infochemicals. *ISME J* **10**, 2892-2906, doi:10.1038/ismej.2016.70 (2016).
- 1038 66 Plichta, D. R., Juncker, A. S., Bertalan, M., Rettedal, E., Gautier, L., Varela, E.,  
1039 Manichanh, C., Fouqueray, C., Levenez, F., Nielsen, T., Dore, J., Machado, A. M., de  
1040 Evgrafov, M. C., Hansen, T., Jorgensen, T., Bork, P., Guarner, F., Pedersen, O.,

- 1041 Metagenomics of the Human Intestinal Tract, C., Sommer, M. O., Ehrlich, S. D.,  
1042 Sicheritz-Ponten, T., Brunak, S. & Nielsen, H. B. Transcriptional interactions suggest  
1043 niche segregation among microorganisms in the human gut. *Nat Microbiol* **1**, 16152,  
1044 doi:10.1038/nmicrobiol.2016.152 (2016).
- 1045 67 D'Hoe, K., Vet, S., Faust, K., Moens, F., Falony, G., Gonze, D., Llorens-Rico, V., Gelens,  
1046 L., Danckaert, J., De Vuyst, L. & Raes, J. Integrated culturing, modeling and  
1047 transcriptomics uncovers complex interactions and emergent behavior in a three-species  
1048 synthetic gut community. *Elife* **7**, doi:10.7554/eLife.37090 (2018).
- 1049 68 Morin, M., Pierce, E. C. & Dutton, R. J. Changes in the genetic requirements for  
1050 microbial interactions with increasing community complexity. *Elife* **7**,  
1051 doi:10.7554/eLife.37072 (2018).
- 1052 69 Gerard, F., Pradel, N. & Wu, L. F. Bactericidal activity of colicin V is mediated by an  
1053 inner membrane protein, SdaC, of *Escherichia coli*. *J Bacteriol* **187**, 1945-1950,  
1054 doi:10.1128/JB.187.6.1945-1950.2005 (2005).
- 1055 70 Christen, B., Abeliuk, E., Collier, J. M., Kalogeraki, V. S., Passarelli, B., Coller, J. A.,  
1056 Fero, M. J., McAdams, H. H. & Shapiro, L. The essential genome of a bacterium. *Mol*  
1057 *Syst Biol* **7**, 528, doi:10.1038/msb.2011.58 (2011).
- 1058 71 Klein, B. A., Tenorio, E. L., Lazinski, D. W., Camilli, A., Duncan, M. J. & Hu, L. T.  
1059 Identification of essential genes of the periodontal pathogen *Porphyromonas gingivalis*.  
1060 *BMC Genomics* **13**, 578, doi:10.1186/1471-2164-13-578 (2012).
- 1061 72 Borghese, R., Turina, P., Lambertini, L. & Melandri, B. A. The atpIBEXF operon coding  
1062 for the F<sub>0</sub> sector of the ATP synthase from the purple nonsulfur photosynthetic  
1063 bacterium *Rhodobacter capsulatus*. *Arch Microbiol* **170**, 385-388 (1998).
- 1064 73 Koebmann, B. J., Nilsson, D., Kuipers, O. P. & Jensen, P. R. The membrane-bound  
1065 H(+)-ATPase complex is essential for growth of *Lactococcus lactis*. *J Bacteriol* **182**,  
1066 4738-4743 (2000).
- 1067 74 Ferrandiz, M. J. & de la Campa, A. G. The membrane-associated F<sub>0</sub>F<sub>1</sub> ATPase is  
1068 essential for the viability of *Streptococcus pneumoniae*. *FEMS Microbiol Lett* **212**, 133-  
1069 138, doi:10.1111/j.1574-6968.2002.tb11256.x (2002).
- 1070 75 Tran, S. L. & Cook, G. M. The F<sub>1</sub>F<sub>o</sub>-ATP synthase of *Mycobacterium smegmatis* is  
1071 essential for growth. *J Bacteriol* **187**, 5023-5028, doi:10.1128/JB.187.14.5023-  
1072 5028.2005 (2005).
- 1073 76 Friedl, P., Hoppe, J., Gunsalus, R. P., Michelsen, O., von Meyenburg, K. & Schairer, H.  
1074 U. Membrane integration and function of the three F<sub>0</sub> subunits of the ATP synthase of  
1075 *Escherichia coli* K12. *EMBO J* **2**, 99-103 (1983).
- 1076 77 Jensen, P. R. & Michelsen, O. Carbon and energy metabolism of atp mutants of  
1077 *Escherichia coli*. *J Bacteriol* **174**, 7635-7641 (1992).
- 1078 78 Harcombe, W. Novel cooperation experimentally evolved between species. *Evolution* **64**,  
1079 2166-2172, doi:10.1111/j.1558-5646.2010.00959.x (2010).
- 1080 79 Du, B., Zielinski, D. C., Monk, J. M. & Palsson, B. O. Thermodynamic favorability and  
1081 pathway yield as evolutionary tradeoffs in biosynthetic pathway choice. *Proc Natl Acad*  
1082 *Sci U S A* **115**, 11339-11344, doi:10.1073/pnas.1805367115 (2018).
- 1083 80 Fallingborg, J. Intraluminal pH of the human gastrointestinal tract. *Dan Med Bull* **46**, 183-  
1084 196 (1999).
- 1085 81 Thiele, I., Hyduke, D. R., Steeb, B., Fankam, G., Allen, D. K., Bazzani, S., Charusanti,  
1086 P., Chen, F. C., Fleming, R. M., Hsiung, C. A., De Keersmaecker, S. C., Liao, Y. C.,  
1087 Marchal, K., Mo, M. L., Ozdemir, E., Raghunathan, A., Reed, J. L., Shin, S. I.,  
1088 Sigurbjornsdottir, S., Steinmann, J., Sudarsan, S., Swainston, N., Thijs, I. M., Zengler,  
1089 K., Palsson, B. O., Adkins, J. N. & Bumann, D. A community effort towards a knowledge-  
1090 base and mathematical model of the human pathogen *Salmonella Typhimurium* LT2.  
1091 *BMC Syst Biol* **5**, 8, doi:10.1186/1752-0509-5-8 (2011).



- 1092 82 Faust, K. & Raes, J. Microbial interactions: from networks to models. *Nat Rev Microbiol*  
1093 **10**, 538-550, doi:10.1038/nrmicro2832 (2012).
- 1094 83 Thiele, I. & Palsson, B. O. A protocol for generating a high-quality genome-scale  
1095 metabolic reconstruction. *Nat Protoc* **5**, 93-121, doi:10.1038/nprot.2009.203 (2010).
- 1096 84 Bankevich, A., Nurk, S., Antipov, D., Gurevich, A. A., Dvorkin, M., Kulikov, A. S., Lesin,  
1097 V. M., Nikolenko, S. I., Pham, S., Prjibelski, A. D., Pyshkin, A. V., Sirotkin, A. V., Vyahhi,  
1098 N., Tesler, G., Alekseyev, M. A. & Pevzner, P. A. SPAdes: a new genome assembly  
1099 algorithm and its applications to single-cell sequencing. *J Comput Biol* **19**, 455-477,  
1100 doi:10.1089/cmb.2012.0021 (2012).
- 1101 85 Antipov, D., Hartwick, N., Shen, M., Raiko, M., Lapidus, A. & Pevzner, P. A.  
1102 plasmidSPAdes: assembling plasmids from whole genome sequencing data.  
1103 *Bioinformatics* **32**, 3380-3387, doi:10.1093/bioinformatics/btw493 (2016).
- 1104 86 Huerta-Cepas, J., Szklarczyk, D., Forslund, K., Cook, H., Heller, D., Walter, M. C.,  
1105 Rattei, T., Mende, D. R., Sunagawa, S., Kuhn, M., Jensen, L. J., von Mering, C. & Bork,  
1106 P. eggNOG 4.5: a hierarchical orthology framework with improved functional annotations  
1107 for eukaryotic, prokaryotic and viral sequences. *Nucleic Acids Res* **44**, D286-293,  
1108 doi:10.1093/nar/gkv1248 (2016).
- 1109 87 Schellenberger, J., Park, J. O., Conrad, T. M. & Palsson, B. O. BiGG: a Biochemical  
1110 Genetic and Genomic knowledgebase of large scale metabolic reconstructions. *BMC*  
1111 *Bioinformatics* **11**, 213, doi:10.1186/1471-2105-11-213 (2010).
- 1112 88 Zomorodi, A. R. & Segre, D. Synthetic Ecology of Microbes: Mathematical Models and  
1113 Applications. *J Mol Biol* **428**, 837-861, doi:10.1016/j.jmb.2015.10.019 (2016).
- 1114 89 Hamilton NE, F. M. ggtern: Ternary Diagrams Using ggplot2. *Journal of Statistical*  
1115 *Software* **87**, 1-17, doi:10.18637/jss.v087.c03 (2018).
- 1116 90 Langmead, B. & Salzberg, S. L. Fast gapped-read alignment with Bowtie 2. *Nat Methods*  
1117 **9**, 357-359, doi:10.1038/nmeth.1923 (2012).
- 1118 91 Anders, S., Pyl, P. T. & Huber, W. HTSeq--a Python framework to work with high-  
1119 throughput sequencing data. *Bioinformatics* **31**, 166-169,  
1120 doi:10.1093/bioinformatics/btu638 (2015).
- 1121 92 Anders, S. & Huber, W. Differential expression analysis for sequence count data.  
1122 *Genome Biol* **11**, R106, doi:10.1186/gb-2010-11-10-r106 (2010).
- 1123 93 Meyer, F., Overbeek, R. & Rodriguez, A. FIGfams: yet another set of protein families.  
1124 *Nucleic Acids Res* **37**, 6643-6654, doi:10.1093/nar/gkp698 (2009).
- 1125 94 Falcon, S. & Gentleman, R. Using GOstats to test gene lists for GO term association.  
1126 *Bioinformatics* **23**, 257-258, doi:10.1093/bioinformatics/btl567 (2007).
- 1127 95 Walter, W., Sanchez-Cabo, F. & Ricote, M. GOplot: an R package for visually combining  
1128 expression data with functional analysis. *Bioinformatics* **31**, 2912-2914,  
1129 doi:10.1093/bioinformatics/btv300 (2015).

## 1130 **Figure Legend**

1131

1132 **Figure 1| Overview of the study design.**

1133

1134 **Figure 2| *V. cholerae* genome-scale model iAM-Vc960 description and performance**

1135 **evaluation.** A) *V. cholerae* genome scale metabolic reconstruction stats (iAM-Vc959). C)  
1136 Comparison of iAM-Vc960 gene essentiality predictions (simulating *in vitro* growth conditions in  
1137 LB) showed 87% accuracy when compared to single gene deletion experiments from OGEE  
1138 essential (n = 458) and non-essential (n = 758) gene datasets. *In silico* gene essentiality was  
1139 graded according to the percentage of reduction in growth rate compared to wild type. Fisher  
1140 exact test as well as Mathew correlation coefficient (MCC) were used to compute significance of

1141 overlapping consistent predictions for *iAM-Vc959*. See Table S2 at  
1142 [https://github.com/alyamahmoud/coinfection\\_modeling/blob/master/supplementary\\_material/sup](https://github.com/alyamahmoud/coinfection_modeling/blob/master/supplementary_material/supplementary_tables.xlsx)  
1143 [plementary\\_tables.xlsx](https://github.com/alyamahmoud/coinfection_modeling/blob/master/supplementary_material/supplementary_tables.xlsx) for details.

1144

1145 **Figure 3| Functional assessment of *V. cholerae* metabolic capabilities relative to *E. coli***

1146 **and *Shigella*.** A) Proportion of metabolic genes included as GPR in GEMs of *E. coli* and

1147 *Shigella*<sup>13</sup> and *V. cholerae* (this study) relative to total number of ORFs in each species. B-C)

1148 Assessment of *iAM-Vc960* metabolic capabilities compared to a set of 55 *E. coli* and *Shigella*

1149 species<sup>13</sup> by unique growth-supporting conditions. Predicted metabolic phenotypes on the

1150 variable growth-supporting nutrient conditions composed of different carbon, nitrogen,

1151 phosphorus, and sulfur nutrient sources in aerobic and anaerobic conditions. Strains were

1152 clustered based on their ability to sustain growth in each different environment. Columns in B

1153 represent individual strains, and rows represent different nutrient conditions. *iAM-Vc960* co-

1154 clustered with *Shigella boydii* CDC 3083-94, *Shigella boydii* Sb227 and *Shigella dysenteriae*

1155 Sd197. Table S4-5 at

1156 [https://github.com/alyamahmoud/coinfection\\_modeling/blob/master/supplementary\\_material/sup](https://github.com/alyamahmoud/coinfection_modeling/blob/master/supplementary_material/supplementary_tables.xlsx)

1157 [plementary\\_tables.xlsx](https://github.com/alyamahmoud/coinfection_modeling/blob/master/supplementary_material/supplementary_tables.xlsx) provide all details about the simulation conditions for the alternative

1158 nutrient sources. A growth rate of 0.01 was used as the cutoff for binarizing the simulation

1159 results and was used to construct the heatmap in B.

1160

1161 **Figure 4| Computational modeling and *in vitro* co-culture of *V. cholerae* and ETEC co-**

1162 **infection.** A) A Schematic showing the modeling framework used to simulate growth of *V.*

1163 *cholerae* and ETEC in a shared environment. B) Ternary plot showing +600 growth conditions

1164 to compare the metabolic capabilities of *V.cholerae* and ETEC monocultures relative to their co-

1165 culture. Values used for plotting are flux rates in the biomass objective function of each

1166 model and are meant to show the ability to grow or not grow under the respective growth

1167 condition rather than the flux value. No change in the overall plot was observed when using

1168 normalized values relative to standard growth conditions (aerobic conditions +

1169 glucose/ammonia/phosphate/sulfate. C) Quantification of *V. cholerae* and ETEC colony-forming

1170 units (CFUs) in monocultures and co-cultures over 10h for the CFU (pooled technical replicates

1171 of n = 3 biological replicates) in M9 minimal media supplemented with 0.5 % glucose, 1 mM

1172 MgSO<sub>4</sub> and 0.1 mM CaCl<sub>2</sub>, 5uL spotted at each time point. Data shown as mean ± SD for three

1173 biological replicates. D) Dynamics of *V. cholerae* in co-culture with enterotoxigenic *E. coli* and in

1174 monoculture. Data shown as mean ± SD for three biological replicates

1175

1176 **Figure 5| Dual RNAseq analysis of *V. cholerae* and ETEC in co-culture.** GO enrichment of

1177 *V. cholerae* differentially expressed FIGfams in co-culture with ETEC A) E36 and B) E616

1178 relative to its single culture. Up and down regulation is in *V. cholerae* when in co-culture relative

1179 to its mono-culture. Z-score is calculated according to GOplot ( $up-down/\sqrt{count}$ )

1180 where *up* and *down* are the number of assigned genes up-regulated (logFC>0) in the data or

1181 down-regulated (logFC<0), respectively.. PCA plots show that the mono-cultures are clustering

1182 differently from the co-cultures for either species.

1183

1184 **Figure 6| Comprehensive map of *V. cholerae* essential metabolic genome** constructed by  
1185 projecting the list of experimentally validated essential genes onto our single and co-infection  
1186 models' predictions. Inhibitors against red-colored targets are expected to be of broader  
1187 spectrum since they are essential for *V. cholerae* in both single and co-infection scenarios.  
1188 Inhibitors against yellow-colored targets are essential for *V. cholerae* growth in single-infection  
1189 scenarios only losing their essentiality in presence of other co-infecting species. Green-colored  
1190 targets are indicate a mismatch between model-predicted and experimentally-validated  
1191 essentiality.  
1192  
1193

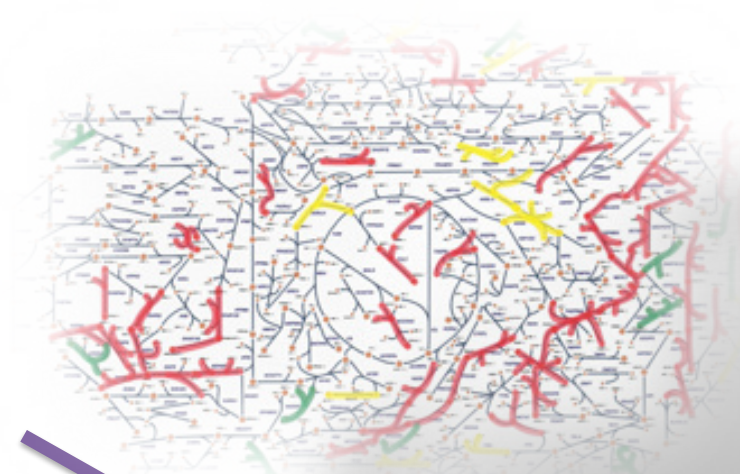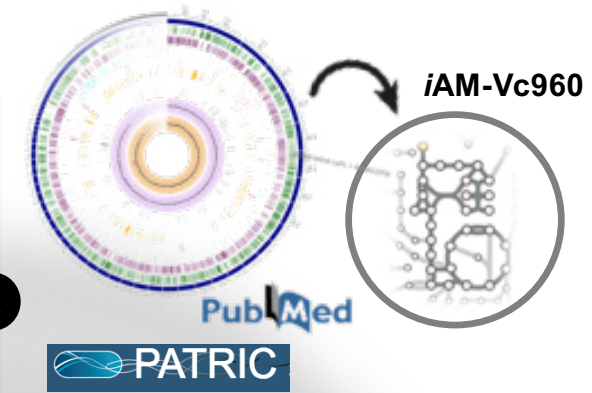

**1**  
**Building *Vibrio cholerae* genome-scale metabolic reconstruction**

**2**  
**Validation of model predicted single gene essentiality**

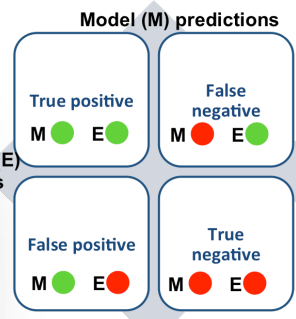

**3**  
**Predicting druggable targets in single and dual infections**

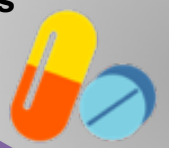

**4**  
**Modeling co-infection of *V. cholerae* & *ETEC* in vitro**

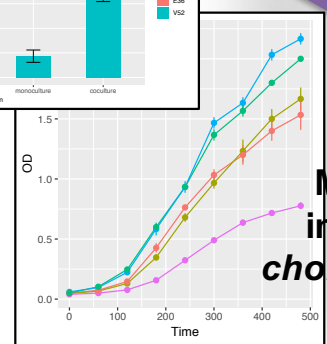

**5**  
**Assessment of *V. cholerae* metabolic capabilities relative to other enteric pathogens (e.g. *E. coli*, *Shigella*)**

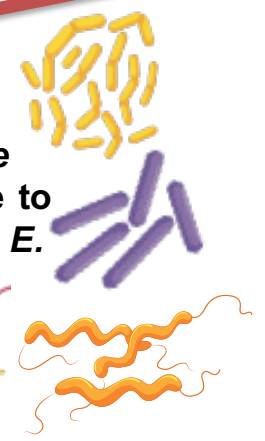

**6**  
**Simulating co-infection of *V. cholerae* & *ETEC* in silico**

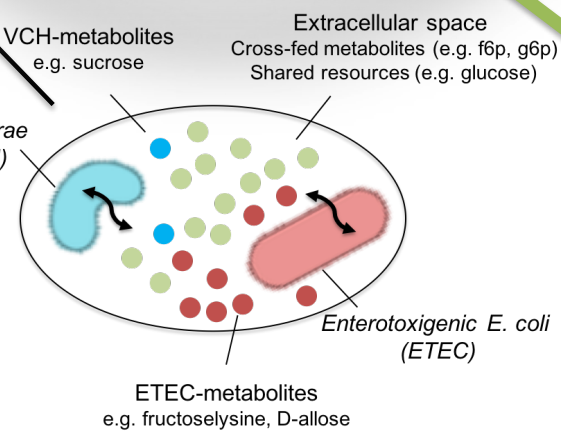

**7**  
**Predicting emergent behavior in co-culture**

**8**  
**Gene expression analysis of single & co-cultures**

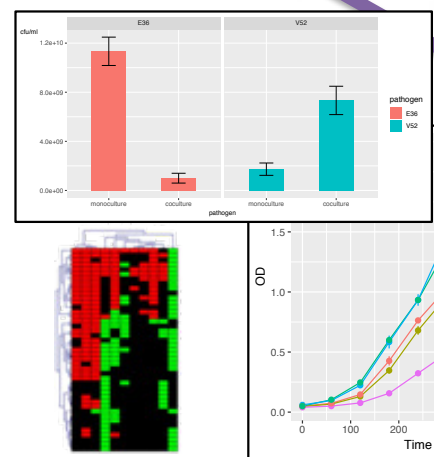

**A**

|                                       | <i>iAM-Vc960</i> |
|---------------------------------------|------------------|
| <b>Genes</b>                          | 960              |
| <b>Reactions</b>                      | 2172             |
| Gene associated (metabolic/transport) | 1570             |
| No gene association (metabolic)       | 118              |
| No gene association (transport)       | 89               |
| Exchange                              | 383              |
| Demand/Sink                           | 11               |
| Biomass                               | 1                |
| Blocked                               | 1197             |
| <b>Metabolites</b>                    |                  |
| Unique metabolites                    | 1088             |
| Cytoplasmic                           | 912              |
| Periplasm                             | 441              |
| Extracellular                         | 388              |

**B**

| <b>Predictions</b> | <b>Experimental</b> |           |               |                            |      |
|--------------------|---------------------|-----------|---------------|----------------------------|------|
|                    | <i>iAM-Vc951</i>    | essential | non-essential | Accuracy (p value)         | MCC  |
|                    | essential           | 94        | 67            | 87%<br>(p-value < 2.2e-16) | 0.54 |
| non-essential      | 51                  | 692       |               |                            |      |



**A**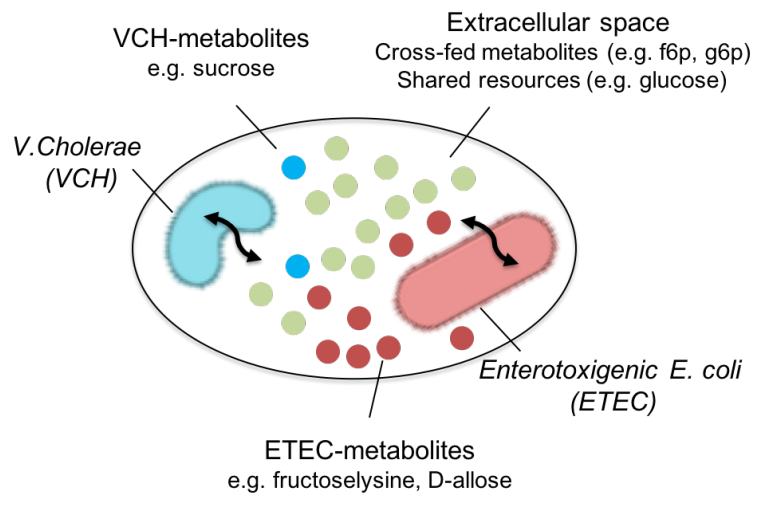**B**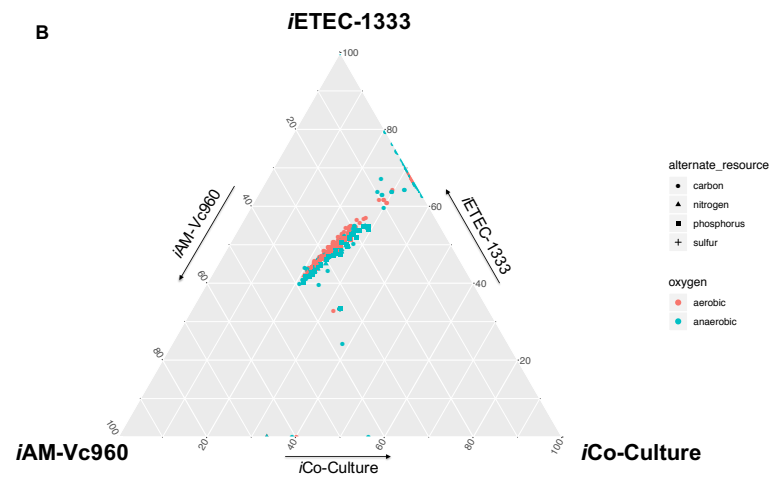**C**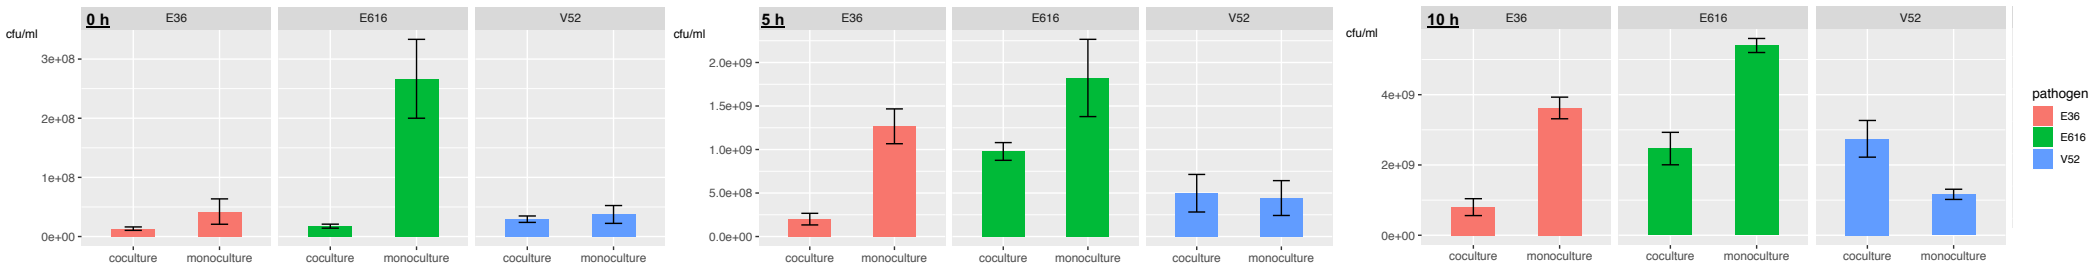**D**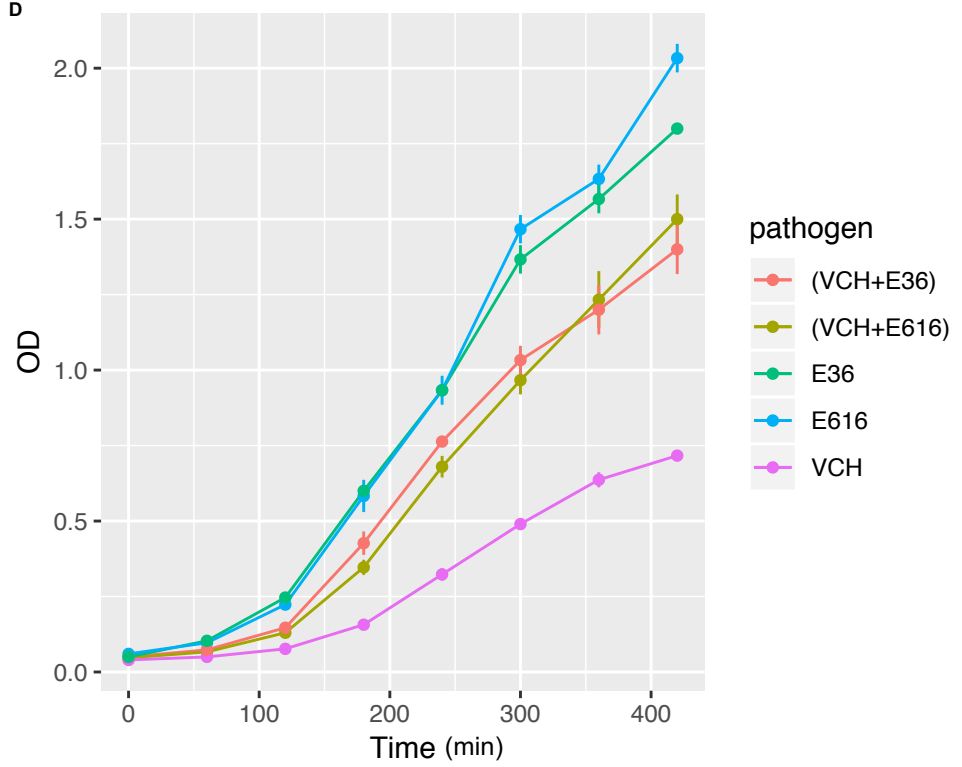

**V. cholerae V52**

**ETEC**

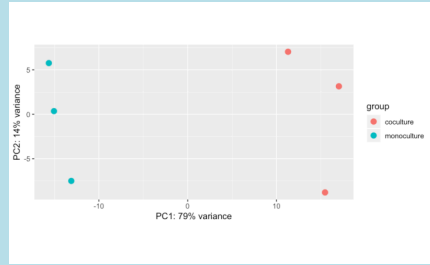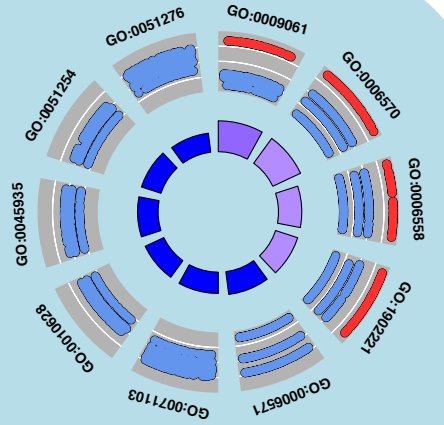

| ID         | Description                                                                   |
|------------|-------------------------------------------------------------------------------|
| GO:0009061 | anaerobic respiration                                                         |
| GO:0006570 | tyrosine metabolic process                                                    |
| GO:0006568 | L-phenylalanine metabolic process                                             |
| GO:1902221 | erythrose 4-phosphate/phosphoenolpyruvate family amino acid metabolic process |
| GO:0006571 | tyrosine biosynthetic process                                                 |
| GO:0071103 | DNA conformation change                                                       |
| GO:0010628 | positive regulation of gene expression                                        |
| GO:0045935 | positive regulation of nucleobase-containing compound metabolic process       |
| GO:0051254 | positive regulation of RNA metabolic process                                  |
| GO:0051276 | chromosome organization                                                       |

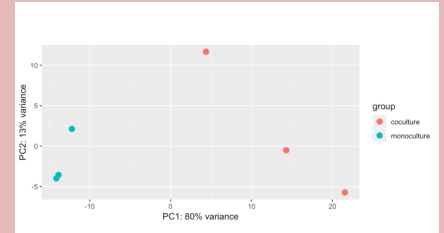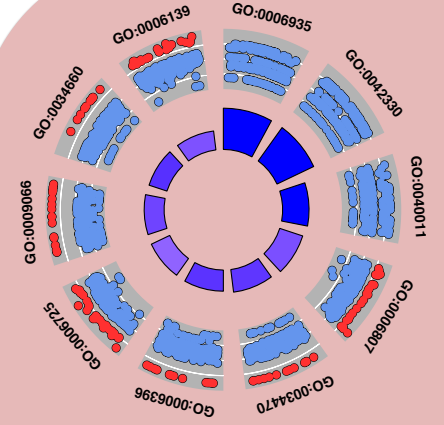

| ID         | Description                                      |
|------------|--------------------------------------------------|
| GO:0006935 | chemotaxis                                       |
| GO:0042330 | taxis                                            |
| GO:0040011 | locomotion                                       |
| GO:0006807 | nitrogen compound metabolic process              |
| GO:0034470 | ncRNA processing                                 |
| GO:0006396 | RNA processing                                   |
| GO:0006725 | cellular aromatic compound metabolic process     |
| GO:0009066 | aspartate family amino acid metabolic process    |
| GO:0034660 | ncRNA metabolic process                          |
| GO:0006139 | nucleobase-containing compound metabolic process |

ETEC E36

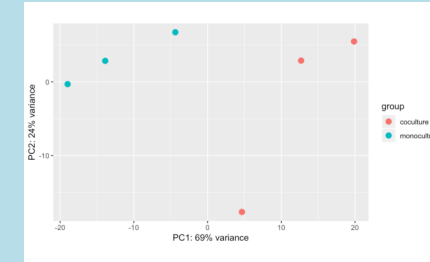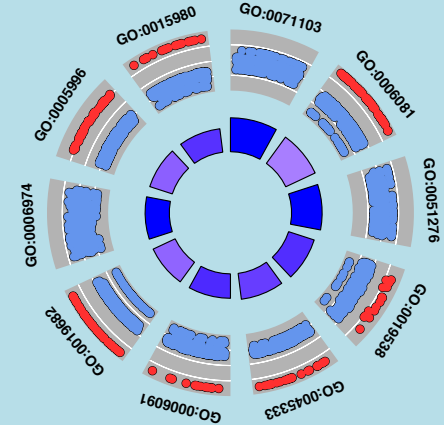

| ID         | Description                                         |
|------------|-----------------------------------------------------|
| GO:0071103 | DNA conformation change                             |
| GO:0006081 | cellular aldehyde metabolic process                 |
| GO:0051276 | chromosome organization                             |
| GO:0019538 | protein metabolic process                           |
| GO:0045333 | cellular respiration                                |
| GO:0006091 | generation of precursor metabolites and energy      |
| GO:0019682 | glyceraldehyde-3-phosphate metabolic process        |
| GO:0006974 | cellular response to DNA damage stimulus            |
| GO:0005996 | monosaccharide metabolic process                    |
| GO:0015980 | energy derivation by oxidation of organic compounds |

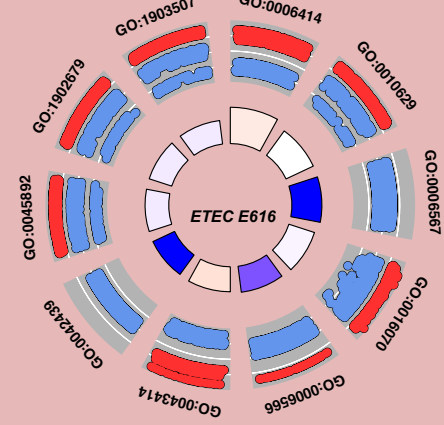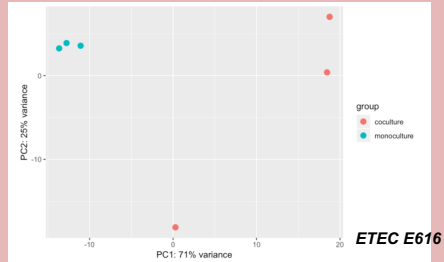

| ID         | Description                                                 |
|------------|-------------------------------------------------------------|
| GO:0006414 | translational elongation                                    |
| GO:0010629 | negative regulation of gene expression                      |
| GO:0006567 | threonine catabolic process                                 |
| GO:0016070 | RNA metabolic process                                       |
| GO:0006566 | threonine metabolic process                                 |
| GO:0043414 | macromolecule methylation                                   |
| GO:0042439 | ethanolamine-containing compound metabolic process          |
| GO:0045892 | negative regulation of transcription, DNA-templated         |
| GO:1902679 | negative regulation of RNA biosynthetic process             |
| GO:1903507 | negative regulation of nucleic acid-templated transcription |

ETEC E616

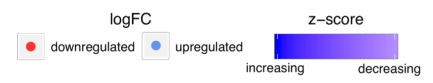

Source: http://biorxiv.org/content/10.1101/2020.06.16.156158v1.full.pdf
